# Supplementary material for: PIRATE: A fast and scalable pangenomics toolbox for clustering diverged orthologues in bacteria
Source: PubMed Central journal article supplement (PMC6785682; doi:10.1093/gigascience/giz119), 2019-10-09
Supplement: giz119_giga-d-19-00122_revision_1.pdf [file giz119_giga-d-19-00122_revision_1.pdf]

## PIRATE: A fast and scalable pangenomics toolbox for clustering diverged orthologues in bacteria

--Manuscript Draft--

|                                                      |                                                                                                                                                                                                                                                                                                                                                                                                                                                                                                                                                                                                                                                                                                                                                                                                                                                                                                                                                                                                                                                                                                                                                                                                                                                                                                                  |                      |
|------------------------------------------------------|------------------------------------------------------------------------------------------------------------------------------------------------------------------------------------------------------------------------------------------------------------------------------------------------------------------------------------------------------------------------------------------------------------------------------------------------------------------------------------------------------------------------------------------------------------------------------------------------------------------------------------------------------------------------------------------------------------------------------------------------------------------------------------------------------------------------------------------------------------------------------------------------------------------------------------------------------------------------------------------------------------------------------------------------------------------------------------------------------------------------------------------------------------------------------------------------------------------------------------------------------------------------------------------------------------------|----------------------|
| <b>Manuscript Number:</b>                            | GIGA-D-19-00122R1                                                                                                                                                                                                                                                                                                                                                                                                                                                                                                                                                                                                                                                                                                                                                                                                                                                                                                                                                                                                                                                                                                                                                                                                                                                                                                |                      |
| <b>Full Title:</b>                                   | PIRATE: A fast and scalable pangenomics toolbox for clustering diverged orthologues in bacteria                                                                                                                                                                                                                                                                                                                                                                                                                                                                                                                                                                                                                                                                                                                                                                                                                                                                                                                                                                                                                                                                                                                                                                                                                  |                      |
| <b>Article Type:</b>                                 | Technical Note                                                                                                                                                                                                                                                                                                                                                                                                                                                                                                                                                                                                                                                                                                                                                                                                                                                                                                                                                                                                                                                                                                                                                                                                                                                                                                   |                      |
| <b>Funding Information:</b>                          | Biotechnology and Biological Sciences Research Council (BB/M026388/1)                                                                                                                                                                                                                                                                                                                                                                                                                                                                                                                                                                                                                                                                                                                                                                                                                                                                                                                                                                                                                                                                                                                                                                                                                                            | Dr Edward J Feil     |
|                                                      | Medical Research Council (MR/L015080/1)                                                                                                                                                                                                                                                                                                                                                                                                                                                                                                                                                                                                                                                                                                                                                                                                                                                                                                                                                                                                                                                                                                                                                                                                                                                                          | Dr Samuel K Sheppard |
| <b>Abstract:</b>                                     | <p>Cataloguing the distribution of genes within natural bacterial populations is essential for understanding evolutionary processes and the genetic basis of adaptation. Here we present a pangenomics toolbox, PIRATE (Pangenome Iterative Refinement And Threshold Evaluation), which identifies and classifies orthologous gene families in bacterial pangenomes over a wide range of sequence similarity thresholds. PIRATE builds upon recent scalable software developments to allow for the rapid interrogation of thousands of isolates. PIRATE clusters genes (or other annotated features) over a wide range of amino-acid or nucleotide identity thresholds and uses the clustering information to rapidly classify paralogous gene families into either putative fission/fusion events or gene duplications. Furthermore, PIRATE orders the pangenome using a directed graph, provides a measure of allelic variation and estimates sequence divergence for each gene family. We demonstrate that PIRATE scales linearly with both number of samples and computation resources, allowing for analysis of large genomic datasets, and compares favorably to other popular tools. PIRATE provides a robust framework for analysing bacterial pangenomes, from largely clonal to panmictic species.</p> |                      |
| <b>Corresponding Author:</b>                         | Sion C Bayliss, Ph.D<br>University of Bath<br>UNITED KINGDOM                                                                                                                                                                                                                                                                                                                                                                                                                                                                                                                                                                                                                                                                                                                                                                                                                                                                                                                                                                                                                                                                                                                                                                                                                                                     |                      |
| <b>Corresponding Author Secondary Information:</b>   |                                                                                                                                                                                                                                                                                                                                                                                                                                                                                                                                                                                                                                                                                                                                                                                                                                                                                                                                                                                                                                                                                                                                                                                                                                                                                                                  |                      |
| <b>Corresponding Author's Institution:</b>           | University of Bath                                                                                                                                                                                                                                                                                                                                                                                                                                                                                                                                                                                                                                                                                                                                                                                                                                                                                                                                                                                                                                                                                                                                                                                                                                                                                               |                      |
| <b>Corresponding Author's Secondary Institution:</b> |                                                                                                                                                                                                                                                                                                                                                                                                                                                                                                                                                                                                                                                                                                                                                                                                                                                                                                                                                                                                                                                                                                                                                                                                                                                                                                                  |                      |
| <b>First Author:</b>                                 | Harry A Thorpe                                                                                                                                                                                                                                                                                                                                                                                                                                                                                                                                                                                                                                                                                                                                                                                                                                                                                                                                                                                                                                                                                                                                                                                                                                                                                                   |                      |
| <b>First Author Secondary Information:</b>           |                                                                                                                                                                                                                                                                                                                                                                                                                                                                                                                                                                                                                                                                                                                                                                                                                                                                                                                                                                                                                                                                                                                                                                                                                                                                                                                  |                      |
| <b>Order of Authors:</b>                             | Harry A Thorpe                                                                                                                                                                                                                                                                                                                                                                                                                                                                                                                                                                                                                                                                                                                                                                                                                                                                                                                                                                                                                                                                                                                                                                                                                                                                                                   |                      |
|                                                      | Nicola M Coyle                                                                                                                                                                                                                                                                                                                                                                                                                                                                                                                                                                                                                                                                                                                                                                                                                                                                                                                                                                                                                                                                                                                                                                                                                                                                                                   |                      |
|                                                      | Samuel K Sheppard                                                                                                                                                                                                                                                                                                                                                                                                                                                                                                                                                                                                                                                                                                                                                                                                                                                                                                                                                                                                                                                                                                                                                                                                                                                                                                |                      |
|                                                      | Edward J Feil                                                                                                                                                                                                                                                                                                                                                                                                                                                                                                                                                                                                                                                                                                                                                                                                                                                                                                                                                                                                                                                                                                                                                                                                                                                                                                    |                      |
|                                                      | Sion C Bayliss, Ph.D                                                                                                                                                                                                                                                                                                                                                                                                                                                                                                                                                                                                                                                                                                                                                                                                                                                                                                                                                                                                                                                                                                                                                                                                                                                                                             |                      |
| <b>Order of Authors Secondary Information:</b>       |                                                                                                                                                                                                                                                                                                                                                                                                                                                                                                                                                                                                                                                                                                                                                                                                                                                                                                                                                                                                                                                                                                                                                                                                                                                                                                                  |                      |
| <b>Response to Reviewers:</b>                        | <p>I would like to thank the editors for considering the manuscript for publication and the reviewers for their time and insightful contributions. I hope that the revisions detailed below contribute to an improved manuscript which will be of broad interest to researchers interested in the field of bacterial genomics.</p>                                                                                                                                                                                                                                                                                                                                                                                                                                                                                                                                                                                                                                                                                                                                                                                                                                                                                                                                                                               |                      |

Editor Notes:

Comment 1) Please register any new software application in the SciCrunch.org database to receive a RRID (Research Resource Identification Initiative ID) number, and include this in your manuscript (in the "software availability" section). This will facilitate tracking, reproducibility and re-use of your tool.

- "PIRATE is available as a software application in the SciCrunch.org database (RRID SCR\_017265)" added to the 'Software Availability' section.

Reviewer #1: This is a well written paper describing a new pan-genome method called PIRATE. They compare it to the state of the art and provide many improvements, so it will be of great use to the microbial bioinformatics community. In particular they use Dimond to speed up comparisons, and do a much better job with paralogs and assembly errors compared to Roary (my tool). The software is easy to install via Conda, and it accepts a very commonly used annotation file format (GFF3 files from PROKKA), all things that are often overlooked in papers, so good work.

Comment 1) You should consider adding the GC content of the 3 species under test since there is a nice range.

- Line 152 was amended to "Three bacterial species were selected for comparison, *Campylobacter jejuni*, *Staphylococcus aureus* and *Escherichia coli*, representing both a range of pangenome sizes (small, medium and large respectively) and GC contents (30.4%, 32.7% and 50.6% respectively)(Supplementary Table 2)".

Comment 2) PopPunk (Lees et al.) has recently come out and would be a relevant citation:

- PopPunk has been added as a citation in the introduction. Additionally Line 252 was changed to "The large increase in the size of the accessory genome content inferred using Roary is primarily due to the post-processing (paralog splitting) of accessory genes and has also been described in previous studies [9]."

Comment 3) Could you add the inflation factor for MCL and how you arrived at it, because it can have a big impact on the end results.

- This was an important parameter for which the inclusion the default parameter was overlooked in the original manuscript. The following text was added to the Methods section, Line 89 - "A default MCL inflation value of 2 was identified as appropriate for intra-species clustering by this study and previous authors . A larger inflation value maybe appropriate for inter-species comparisons and can be modified within the software."

Reviewer #2: This manuscript presents the pangenomic analysis pipeline PIRATE, benchmarks it and compares it to other tools roary and panX (I am one of the developers of panX). The tool implements a series of sensible steps to cluster annotated features into orthologous groups.

Comment 1) Benchmarking is a little underwhelming. The tool is marketed as being able to deal with genome collection at many different degrees of divergence and diversity. Testing on just 253 *Staph aureus* genomes doesn't really do this justice, the results for *E coli* and *Campy* are restricted to performance in the supplement. Why not also test on very diverse species (like *Plochlorococcus marinus*) or entire orders such as *Pseudomonadales*. The comparisons between tools are also restricted to two numbers (core and accessory genes). More informative comparisons would be between cluster size distribution and some analysis of whether the different tools

actually found the same clusters.

- We thank the reviewer for this comment and have applied PIRATE to two additional example datasets, 48 draft genomes of *Prochlorococcus marinus* and a collection of 497 complete genomes of *Pseudomonas* species. For brevity the results of these analyses are included in the 'Additional Examples' section of the Supplementary Analysis (Supplementary Figures 7+8) and the presence of these additional examples have been alluded to in the 'Application to Real Data' section of the main text at Line 273 - "Additional examples of real data processed using PIRATE have been included in the Supplementary Analysis to highlight application of the tool to large or diverse datasets (Supplementary Figures 7+8). PIRATE was applied to 48 draft genomes of *Prochlorococcus marinus*, a marine cyanobacteria with extremely diverse gene complement, and a collection of 497 complete genomes of assorted *Pseudomonas* species, a genus of Gram-negative Gammaproteobacteria with highly variable genome sizes."

In addition to this we have performed some additional clustering analysis which has been detailed in the Supplementary Analysis (Section: , Figure 9). The text "An analysis of the clusters produced by the tools indicated that there was broad intersection between methodologies when considering core genes, but that differences become more pronounced in the intermediate and accessory pangenome (Supplementary Analysis, Supplementary Figure 9)." was added at Line 255 to address the relevant finding in the main text.

Comment 2) Page 1, last paragraph: The issue of overclustering/underclustering should be discussed a little more. In particular, I think the authors should highlight the fact that there is no objective truth to compare against and what is considered a useful clustering output to some extent depends on the downstream analysis.

- Many thanks to the reviewer for this excellent comment, this is a very relevant point which improves the readers' understanding of the scope of the work. The following lines have been added to the introduction at Line 54 - "The impact of over- and under-clustering is relevant to consider in the context of downstream research applications. Under-clustering (or over-splitting) can create a misleading impression of pangenome diversity and composition when considering how much gene diversity exists in the accessory genome [9]. However, for a study identifying genetic determinants associated with a phenotype, such as antibiotic resistance, core and accessory allelic variation which has been misclassified as additional accessory genes may have little to no impact as the causative genes in question may still be still correctly identified."

Comment 3) PanX runtimes are quadratic due to all against all comparison. But in the divide and conquer mode, runtimes are linear other than for the tree building step. Using runtimes when running panX with ``-dmcdc`` would be a more appropriate comparison.

- In order to make the methodological comparison more appropriate the benchmarking of PanX was rerun using `-dmcdc` and `-subset_size` (set to `#samples/#threads`). The results do not substantially change the comparisons between the tools but the execution time of PanX is significantly reduced. The results have been updated in the relevant panels in Figure 2 and the text in the main manuscript amended:

a) Line 174 added "In order to aid comparison PanX was used with the `-dmcdc` option which allows multithreading of DIAMOND. Without this option the run time of PanX scales quadratically and is inappropriate for larger datasets and comparison to the other tools."

b) The paragraph following Figure 2 (Line 181) has been slightly amended to more clearly delineate between PIRATE using BLAST or DIAMOND. It now reads: "The execution time of Roary and PIRATE scaled in an approximately linear manner with increasing number of samples (Figure 2.A). PanX scaled super-linearly, making application to larger datasets potentially problematic. Roary and PIRATE were faster than PanX at all time points without gene-by-gene alignment. The execution time of

PIRATE using DIAMOND was comparable to that of Roary without gene-by gene alignment (Figure 2.A, top panel). Roary completed marginally quicker than PIRATE using BLAST without gene-by-gene alignment at all sample sizes. When gene-by-gene alignment was applied both Roary and PIRATE scaled sub-linearly with number of samples, however PIRATE using DIAMOND or BLAST completed substantially faster than either Roary or PanX (Figure 2.A, bottom panel). PIRATE exhibited lower memory usage than the other tools tested, scaling sub-linearly with number of samples (Figure 2.B). In conclusion, PIRATE compared favourably in both execution time and memory usage and these metrics suggest PIRATE can be flexibly applied to large datasets on routinely available hardware”

Comment 4) On page 4, line 5, you state that panX requires an alignment for paralog splitting. This is correct. But it also requires a tree. This is where the main computational overhead comes from.

- Line 169 has been amended to “It should be noted that both PIRATE and Roary include post-processing of paralogs in the comparison without alignment or phylogenetic tree reconstruction, producing a complete output. PanX does not do this, as alignment, followed by tree building, is a necessary step in paralog identification in this pipeline. ”

Comment 5) Fig 3D is rather unhelpful and difficult to parse in its current form. All relevant parse happen in a tiny fraction of the figure and the 0-line for the upper part has to be guessed.

- Figure 3D has been amended with rescaled axis in order to provide more space for the relevant information and to provide an easily observed zero value on the x-axis of the top panel.

Comment 6) After some fiddling, I could get the pipeline to work. See problems I encountered below.

- I have updated the installation instructions (github README) to specify that the bioconda channels should be added before installing PIRATE in order to clear up any confusion (below):

```
conda config --add channels defaults
conda config --add channels bioconda
conda config --add channels conda-forge
```

Reviewer #3: PIRATE represents an interesting method to conduct pan-genomics by comparing the number of clusters at different clustering thresholds. I installed the software easily through CONDA and it seemed to work well on the datasets that I tested.

Comment 1) Reading the paper, I would have liked to see further delineation between PIRATE and other tools. For example, what are the biological ramifications of large cluster sizes at lower identities? I realize that this paper really discusses the method and not the applications, but some application would be helpful on how different clustering thresholds affect the interpretation.

We have expanded upon the examples as suggested by the referee (Line 209):

“PIRATE can quickly be used to identify genes with both highly conserved or divergent sequence similarity or variable copy number. The biological ramifications of these genes will vary between applications. A number of the genes exhibiting high amino acid sequence divergence have been well studied. For example the the core ‘accessory regulator’ agr locus exhibited a range of sequence identity clustering thresholds; agrA clusters at 91 %, agrB and agrC at 65 % and agrD at 45 % amino acid

identity, each with a copy number of 1. We identified that another gene, ArlR, which is known to interact with the agr locus, has a similarly low amino acid similarity of 45 % perhaps implying that the linked genes have undergone similarly patterns of diversifying selection. This example highlights how diversification may lead to over-splitting of genes if only a single sequence identity threshold were used, even if this threshold were applicable to the vast majority of genes in the pangenome. Expansion of families of MGEs or individual genes within the population can also be identified from the outputs. For example, IS256, known to play a role in biofilm formation and resistance to various antimicrobials, is present in 35 genomes, has a conserved amino acid sequence (<2% divergence) but a variable copy number of between 1 to 32 copies within the genomes in which it is present. Using these data it is possible to identify the strains which have an increased dosage of IS256.”

Comment 2) I did have some questions about the time to run PIRATE. The manuscript suggests that it is faster than Roary using either blast or diamond. When I run Roary and PIRATE on your set of 100 E. coli genomes using default parameters and 8 processors, I find that Roary finished in 21m46s and PIRATE finished in 1h14m.

- The run time of PIRATE is faster than roary when alignment (roary: -en, PIRATE: -a) is toggled on. This is because alignment is fully parallelized in PIRATE. PIRATE running on default parameters will not be faster than roary without alignment as PIRATE follows many of the steps in the roary pipeline, plus the addition of multiple MCL thresholds followed by paralog identification and classification (which is more computationally expensive than the paralog splitting of roary due to the use of CDHIT and BLAST on a per cluster basis). To more explicitly address this point Line 184 was modified to “The execution time of PIRATE using DIAMOND was comparable to that of Roary without gene-by gene alignment (Figure 2.A, top panel). Roary completed marginally faster than PIRATE using BLAST without gene-by-gene alignment at all sample sizes.” and Line 186 to “When gene-by-gene alignment was applied both Roary and PIRATE scaled sub-linearly with number of samples, however PIRATE completed substantially faster than Roary and PanX (Figure 2.A, bottom panel).”

Comment 3) There may also be some issues scaling with genome diversity. For example, running PIRATE on 61 Orientia tsutsugamushi genomes with default PIRATE parameters, took over 4 hours to complete: "PIRATE completed in 14803s". This makes me worry about the scalability of the algorithm to larger, complex datasets. I think that additional benchmarking on large and complex datasets would help convince me that this method will scale with increasingly large datasets.

- The time to complete PIRATE scales linearly with sample size. Large numbers of paralogous genes, either real or caused by poor assemblies, will increase run time. For the purpose of the current manuscript all samples have been run on default settings. This may be suboptimal for more diverse datasets. There are various options available to reduce the potential runtime of PIRATE for large or diverse datasets, such as excluding HSPs that are not below a set proportion of the query length, increasing the MCL inflation value to reduce over-clustering (and therefore reduce paralogs) or by using DIAMOND as a faster alternative to BLAST. In order to address these concerns I have run PIRATE on two additional diverse collections of bacterial genomes using some of the options to reduce execution time. These included 497 complete genomes of the genus Pseudomonas that were available from the RefSeq database and a dataset of 48 Prochlorococcus marinus draft genomes, a diverse bacterial species suggested by Reviewer 1. Prochlorococcus marinus was used in preference to Orientia tsutsugamushi due to a larger number of publicly available genomes with a similarly large and diverse accessory genome. PIRATE completed in 2976s (50 mins) for the Prochlorococcus marinus dataset and 188,216s (52.3h) for the larger Pseudomonas dataset. We believe that these run times are consistent with the application of PIRATE to large and/or diverse datasets using accessible hardware. Additional results have been added in the 'Additional Examples' section of the Supplementary Analysis (Supplementary Figures 7+8).

|                                |                 |
|--------------------------------|-----------------|
| <b>Additional Information:</b> |                 |
| <b>Question</b>                | <b>Response</b> |

|                                                                                                                                                                                                                                                                                                                                                                                                                                                                                                                                     |            |
|-------------------------------------------------------------------------------------------------------------------------------------------------------------------------------------------------------------------------------------------------------------------------------------------------------------------------------------------------------------------------------------------------------------------------------------------------------------------------------------------------------------------------------------|------------|
| <p>Are you submitting this manuscript to a special series or article collection?</p>                                                                                                                                                                                                                                                                                                                                                                                                                                                | <p>No</p>  |
| <p><b>Experimental design and statistics</b></p> <p>Full details of the experimental design and statistical methods used should be given in the Methods section, as detailed in our <a href="#">Minimum Standards Reporting Checklist</a>. Information essential to interpreting the data presented should be made available in the figure legends.</p> <p>Have you included all the information requested in your manuscript?</p>                                                                                                  | <p>Yes</p> |
| <p><b>Resources</b></p> <p>A description of all resources used, including antibodies, cell lines, animals and software tools, with enough information to allow them to be uniquely identified, should be included in the Methods section. Authors are strongly encouraged to cite <a href="#">Research Resource Identifiers</a> (RRIDs) for antibodies, model organisms and tools, where possible.</p> <p>Have you included the information requested as detailed in our <a href="#">Minimum Standards Reporting Checklist</a>?</p> | <p>Yes</p> |
| <p><b>Availability of data and materials</b></p> <p>All datasets and code on which the conclusions of the paper rely must be either included in your submission or deposited in <a href="#">publicly available repositories</a> (where available and ethically appropriate), referencing such data using a unique identifier in the references and in the “Availability of Data and Materials” section of your manuscript.</p> <p>Have you have met the above requirement as detailed in our <a href="#">Minimum</a></p>            | <p>Yes</p> |

[Standards Reporting Checklist?](#)

[Click here to view linked References](#)

# 1 **PIRATE: A fast and scalable pangenomics toolbox for clustering diverged** 2 **orthologues in bacteria**

3 Sion C. Bayliss<sup>1\*</sup>, Harry A. Thorpe<sup>1</sup>, Nicola M. Coyle<sup>1</sup>, Samuel K. Sheppard<sup>1</sup> and Edward J. Feil<sup>1</sup>

4 <sup>1</sup>The Milner Centre for Evolution, Department of Biology and Biochemistry, University of Bath, Bath BA2 7AY

5 \*To whom correspondence should be addressed.

## 6 **Abstract**

7  
8 Cataloguing the distribution of genes within natural bacterial populations is essential for  
9 understanding evolutionary processes and the genetic basis of adaptation. Here we present a  
10 pangenomics toolbox, PIRATE (Pangenome Iterative Refinement And Threshold Evaluation), which  
11 identifies and classifies orthologous gene families in bacterial pangenomes over a wide range of  
12 sequence similarity thresholds. PIRATE builds upon recent scalable software developments to allow  
13 for the rapid interrogation of thousands of isolates. PIRATE clusters genes (or other annotated  
14 features) over a wide range of amino-acid or nucleotide identity thresholds and uses the clustering  
15 information to rapidly classify paralogous gene families into either putative fission/fusion events or  
16 gene duplications. Furthermore, PIRATE orders the pangenome using a directed graph, provides a  
17 measure of allelic variation and estimates sequence divergence for each gene family. We demonstrate  
18 that PIRATE scales linearly with both number of samples and computation resources, allowing for  
19 analysis of large genomic datasets, and compares favorably to other popular tools. PIRATE provides a  
20 robust framework for analysing bacterial pangenomes, from largely clonal to panmictic species.

21 **Availability:** PIRATE is implemented in Perl and is freely available under a GNU GPL 3 open source  
22 license from <https://github.com/SionBayliss/PIRATE>. PIRATE is available as a software application  
23 in the SciCrunch.org database (RRID SCR\_017265).

24 **Contact:** s.bayliss@bath.ac.uk

25 **Keywords:** Microbial genomics, pangenomics, next-generation sequencing, bioinformatics.

26 **Supplementary Information:** Supplementary data is available online.

27

28

29

30

31

32

33

34

35



## 36 **Background**

37 For most bacteria the complement of genes for a given species is far greater than the number of genes  
38 in any one strain. Comprising core genes shared by all individuals in a species and accessory genes  
39 that are variously present or absent, the pangenome represents a pool of genetic variation that  
40 underlies the enormous phenotypic variation observed in many bacterial species. Through horizontal  
41 gene transfer, bacteria can acquire genes from this pangenome pool that bestow important traits such  
42 as virulence or antimicrobial resistance [1].

43 Over the last decade, advances in whole genome sequencing technologies and bioinformatic analyses  
44 have allowed the cataloguing of genes and intergenic regions that make up the pangenomes of many  
45 species [2–9].

46 Current approaches define genes on the basis of strict sequence identity thresholds [2,3,7,8], e-value  
47 cutoffs [5,6] and bit score ratios [4]. However, genes accrue variation at different rates under the  
48 influence of positive and purifying selection [10]. Therefore, it is difficult to define a single identity  
49 threshold beyond which genes cease to belong to the same family. Relaxed thresholds risk over-  
50 clustering of related gene families, whilst conservative thresholds risk over-splitting, by  
51 misclassifying highly divergent alleles of the same gene into multiple clusters. Over-splitting is likely  
52 to be especially problematic in vertically acquired core genes that have undergone strong diversifying  
53 selection or horizontally acquired accessory genes from multiple source populations which share a  
54 distant common ancestor. The impact of over- and under-clustering is relevant to consider in the  
55 context of downstream research applications. Under-clustering (or over-splitting) can create a  
56 misleading impression of pangenome diversity and composition when considering how much gene  
57 diversity exists in the accessory genome [9]. However, for a study identifying genetic determinants  
58 associated with a phenotype, such as antibiotic resistance, core and accessory allelic variation which  
59 has been misclassified as additional accessory genes may have little to no impact as the causative  
60 genes in question may still be still correctly identified.

61 In order to address these considerations we have created the Pangenome Iterative Refinement And  
62 Threshold Evaluation (PIRATE) toolbox which evaluates and classifies genetic diversity within the  
63 pangenome. PIRATE provides the means to create pangenomes from any annotated features (e.g.  
64 CDS, tRNA, rRNA) over a user-defined range of amino acid or nucleotide identity thresholds.  
65 PIRATE provides measures of sequence divergence and allelic diversity within the sample. PIRATE  
66 also categorises paralogs into duplication and/or fission loci, loci disrupted by an insertion, deletion or  
67 nonsense mutation. A consistent nomenclature is applied to allow for the user identify gene clusters  
68 which are the product of paralog splitting, duplication or fission, providing additional context on both  
69 methodological and evolutionary gene provenance. This rapid, scalable method allows for a  
70 comprehensive overview of gene content and allelic diversity within the pangenome.

71

72

73

74

75

76

77

78

79

## 80 Methods

### 81 Pangenome Construction

82 The PIRATE pipeline has been summarised as a schematic in Figure 1.A. The input is a set of GFF3  
83 files. Feature sequences are filtered and the dataset is reduced by iterative clustering using CD-HIT  
84 [2,11]. The longest sequence from each CD-HIT cluster is used as a representative for sequence  
85 similarity searching (BLAST/DIAMOND) [12,13]. The normalised bit scores of the resulting all-vs-  
86 all comparisons are clustered using MCL after removing hits which fall below a relaxed threshold of  
87 percentage identity (default: 50%) [14]. A default MCL inflation value of 2 was identified as  
88 appropriate for intra-species clustering by this study and previous authors [2]. A larger inflation value  
89 may be appropriate for inter-species comparisons and can be modified as appropriate. The initial  
90 clustering at this lower bounds threshold is used to define putative ‘gene families’ (Figure 1.B). Initial  
91 designations may not represent the final outputs as families containing paralogs maybe subsequently  
92 split during the paralog splitting step. MCL clustering is repeated over a range of user specified  
93 percentage identity thresholds (default 50-95% amino acid identity, increments of 5). Unique MCL  
94 clusters at higher thresholds are used to identify ‘unique alleles’ (Figure 1.B). Loci may be shared  
95 between multiple unique alleles (MCL clusters) at different percentage identity thresholds (e.g. Figure  
96 1.B – Family B). PIRATE uses the highest threshold at which a ‘unique allele’ is observed to define  
97 the shared percentage identity in the resulting outputs.

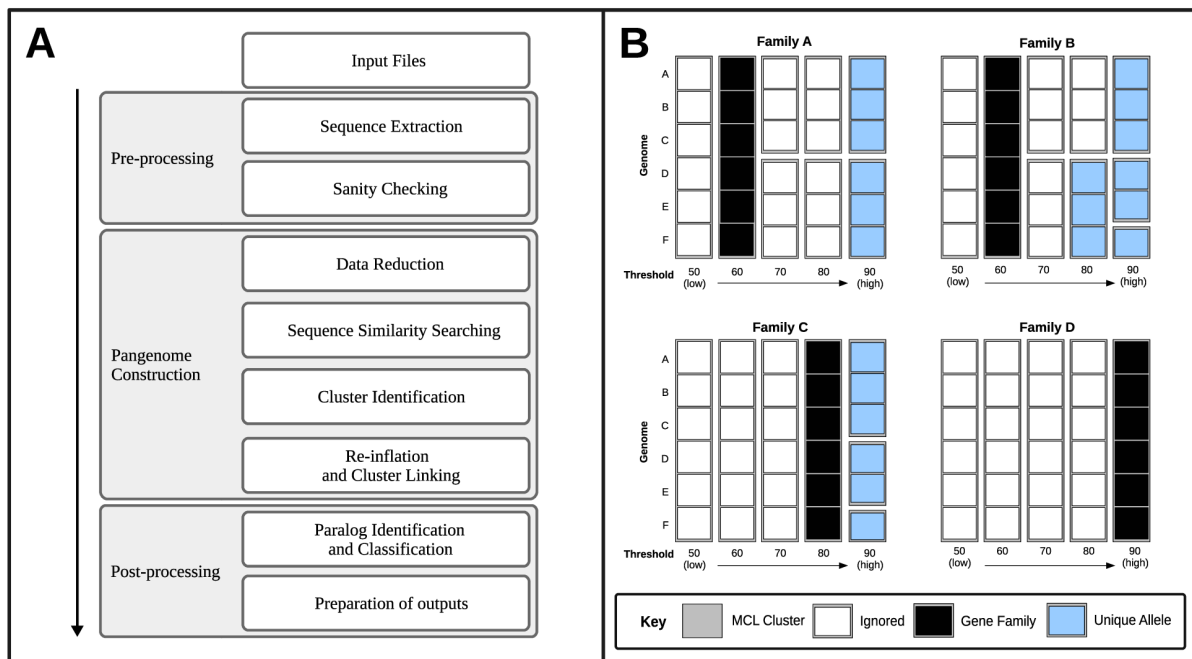

98

99 Figure 1. (A) Flow chart denoting a simplified workflow. (B) Example cluster classification. Blocks represent  
100 sequences from unique genomes. Grey blocks represent MCL clusters at various percentage identity cut-offs.  
101 Black squares indicate a ‘gene family’ cluster, the lowest %id threshold from the MCL clustering. Blue squares  
102 represent ‘unique alleles’, MCL clusters at higher % identity thresholds with unique combinations of sequences  
103 (at the higher threshold at which they are observed together). White squares represent redundant MCL clusters,  
104 these are not present in the PIRATE output.

### 105 Paralog Classification

106 Clusters which contain more than one sequence per individual genome are putative paralogs and  
107 undergo an additional post-processing step (Supplementary Figure 6). All loci are clustered on the  
108 basis of sequence length (98% similar) using CD-HIT. Homology between representative loci is  
109 established using all-vs-all BLAST. Loci with no significant overlaps are considered putative fission  
110 loci and are compared against a reference sequence (the longest sequence in the gene family) which is  
111 considered the most ‘complete’ version of the gene. All combinations of putative fission loci are

112 compared to the reference in order to find the combination which gives the most parsimonious  
113 coverage of the reference sequence. This combination locus is classified as a ‘fission locus’ that may  
114 have formed via gene disruption (e.g. insertion, deletion or nonsense mutation). Any locus which  
115 overlaps with all other loci or is not a part of a fission cluster is considered a duplication. The process  
116 is iterated until all loci have been classified.

### 117 ***Cluster Splitting***

118 After paralog classification, fission loci are treated as a single locus. Gene families that contain  
119 genomes with multiple loci, after accounting for fission loci, potentially represent two or more related  
120 gene families that have been over-clustered. In these cases the gene family is checked against the  
121 presence of MCL clusters (unique alleles) which contains a single copy of the loci in all constituent  
122 genomes (Supplementary Figure 6). These alleles are thereafter considered separate gene families  
123 with nomenclature denoting their shared provenance (e.g. g0001\_1, g0001\_2).

### 124 ***Post-processing***

125 Syntenic connections between gene families in their source genomes are used to create a pangenome  
126 graph. Parsimonious paths between gene families contained in the same number of genomes are used  
127 to identify co-localised gene families. This information is used to order the resulting tabular  
128 pangenome file on syntenic blocks of genes in descending order of number of genomes those blocks  
129 were present in. Gene-by-gene alignments are produced using MAFFT in order to generate a core  
130 gene alignment [15]. Installing the relevant dependencies in R allows for PIRATE to produce a pdf  
131 containing descriptive figures.

132 A number of supplementary tools are provided to extract, align and subset sequences, and to compare  
133 and visualize outputs. In order to facilitate integration with existing pipeline, scripts have been  
134 provided to convert the outputs of PIRATE into common formats which allows for them to be used as  
135 inputs to software used for downstream analysis, such as the PanX user-interface, SCOARY,  
136 Microreact or Phandango [6,16–18]. A full description of the methodology and comparative  
137 benchmarks has been provided in the supplementary information (Supplementary Information).

138

139

140

141

142

143

144

145

146

147

148

## 149 Results and Discussion

### 150 Benchmarking and comparison to other tools

151 The performance of PIRATE was assessed on a range of parameters related to its scalable application  
152 to large numbers of bacterial genomes. Three bacterial species were selected for comparison,  
153 *Campylobacter jejuni*, *Staphylococcus aureus* and *Escherichia coli*, representing both a range of  
154 pangenome sizes (small, medium and large respectively) and GC content (30.4%, 32.7% and 50.6%  
155 respectively)(Supplementary Table 2). Memory usage and wall time were found to scale  
156 approximately linearly with increasing numbers of isolates and the amount of memory and time per  
157 sample was consistent (Supplementary Figures 1+3). PIRATE has been extensively parallelised and  
158 the availability of additional cores was found to significantly reduce runtime (Supplementary Figure  
159 2).

160 A range of tools have been developed for constructing bacterial pangenomes. For comparison, we  
161 chose two of the most widely used packages, Roary and PanX [2,6]. These tools have some  
162 similarities to PIRATE that facilitate comparison; all three tools share similar clustering workflows  
163 (BLAST/DIAMOND, MCL) and require annotated genomes as input. Differences in methodology lie  
164 primarily in the post processing of clusters, Roary uses a single percentage identity threshold for MCL  
165 clustering and separates paralogs based upon their neighboring genes and PanX splits paralogous  
166 genes using an alignment/tree-based method rather than the CDHIT-BLAST approach used by  
167 PIRATE. Each of the three tools were applied to subsets of 50, 100, 150, 200 and 250 *Staphylococcus*  
168 *aureus* complete genomes downloaded from the RefSeq database (Supplementary Table 2), for  
169 comparisons on the same hardware using 8 cores [19]. It should be noted that both PIRATE and Roary  
170 include post-processing of paralogs in the comparison without alignment or phylogenetic tree  
171 reconstruction, producing a complete output. PanX does not do this, as alignment, followed by tree  
172 building, is a necessary step in paralog identification in this pipeline. Therefore, analyses were run  
173 with and without gene-by-gene alignment in order to make unbiased comparisons. Execution time and  
174 memory usage per sample were recorded (Figure 2). In order to aid comparison PanX was used with  
175 the -dmhc option which allows multithreading of DIAMOND. Without this option the run time of  
176 PanX scales quadratically and is inappropriate for larger datasets and comparison to the other tools.

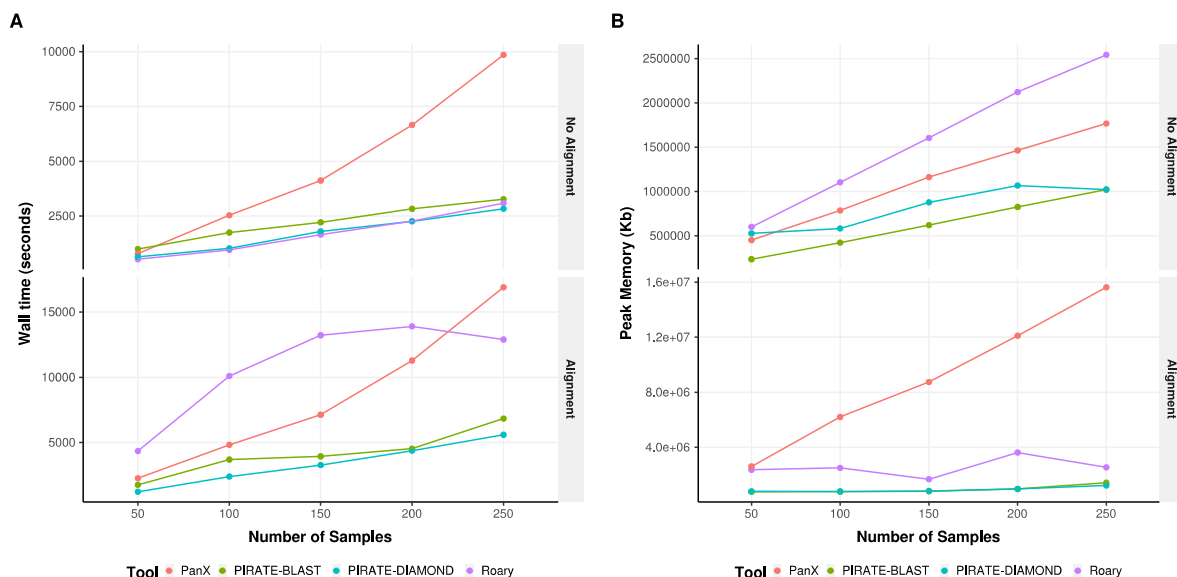

177 Figure 2. Benchmarking of PIRATE against Roary and PanX. Wall time (seconds) and peak memory usage (Kb)  
178 were recorded for each tool run on a dataset of 50, 100, 150, 200 and 250 complete *Staphylococcus aureus*  
179 genomes from the RefSeq database with and without gene-by-gene alignment.

180

181 The execution time of Roary and PIRATE scaled in an approximately linear manner with increasing  
182 number of samples (Figure 2.A). PanX scaled super-linearly, making application to larger datasets  
183 potentially problematic. Roary and PIRATE were faster than PanX at all time points without gene-by-  
184 gene alignment. The execution time of PIRATE using DIAMOND was comparable to that of Roary  
185 without gene-by gene alignment (Figure 2.A, top panel). Roary completed marginally quicker than  
186 PIRATE using BLAST without gene-by-gene alignment at all sample sizes. When gene-by-gene  
187 alignment was applied both Roary and PIRATE scaled sub-linearly with number of samples, however  
188 PIRATE using DIAMOND or BLAST completed substantially faster than either Roary or PanX  
189 (Figure 2.A, bottom panel). PIRATE exhibited lower memory usage than the other tools tested,  
190 scaling sub-linearly with number of samples (Figure 2.B). In conclusion, PIRATE compared  
191 favourably in both execution time and memory usage and these metrics suggest PIRATE can be  
192 flexibly applied to large datasets on routinely available hardware.

### 193 **Application to real data**

194 PIRATE was applied to 253 complete *Staphylococcus aureus* genomes downloaded from the RefSeq  
195 database (accessed: 08/11/18) (Supplementary Table 2) [20]. PIRATE was run on default settings over  
196 a wide range of amino acid percentage identity thresholds (45, 50, 60, 65, 70, 75, 80, 85, 90, 91-99 in  
197 increments of 1%) (Supplementary Table 2). The pangenome of *S. aureus* comprised 4250 gene  
198 families of which 2433 (57.25 %) were classified as core (>95% genomes) and 1817 (42.75 %) as  
199 accessory (Figure 3.A). Gene families with an average copy number greater than 1.25 loci per genome  
200 after paralog classification were excluded from further analysis (178 gene families, 4.18 %) as direct  
201 comparison between high copy number or potentially over-clustered families is problematic. Of the  
202 remaining 4072 gene families, 740 (18.17 %) clustered at thresholds of less than 95% percentage  
203 identity. At these thresholds a significantly different number of 'divergent' gene families were  
204 observed (Chi Squared test p-value = < 0.0001) between core and accessory genomes; 21.83 % of  
205 accessory genes (383/1754) clustered at less than 95% homology compared to only 15.40 % of core  
206 genes (357/2318) (Figure 3.B). A possible explanation for this is that the accessory genes may have  
207 been horizontally acquired and therefore may be from diverse genetic backgrounds with different  
208 evolutionary histories.

209 PIRATE can quickly be used to identify genes with both highly conserved or divergent  
210 sequence similarity or variable copy number. The biological ramifications of these genes will vary  
211 between applications. For example the core 'accessory regulator' *agr* locus exhibited a range of  
212 sequence identity clustering thresholds; *agrA* clusters at 91 %, *agrB* and *agrC* at 65 % and *agrD* at 45  
213 % amino acid identity, each with a copy number of 1. We identified that another gene, *ArlR*, which is  
214 known to interact with the *agr* locus, has a similarly low amino acid similarity of 45 % perhaps  
215 implying that the linked genes have undergone similarly patterns of diversifying selection. This  
216 example highlights how diversification may lead to over-splitting of genes if only a single sequence  
217 identity threshold were used, even if this threshold were applicable to the vast majority of genes in the  
218 pangenome. Expansion of families of MGEs or individual genes within the population can also be  
219 identified from the outputs. For example, IS256, known to play a role in biofilm formation and  
220 resistance to various antimicrobials, is present in 35 genomes, has a conserved amino acid sequence  
221 (<2% divergence) but a variable copy number of between 1 to 32 copies within the genomes in which  
222 it is present. Using these data it is possible to identify the strains which have an increased dosage of  
223 IS256.

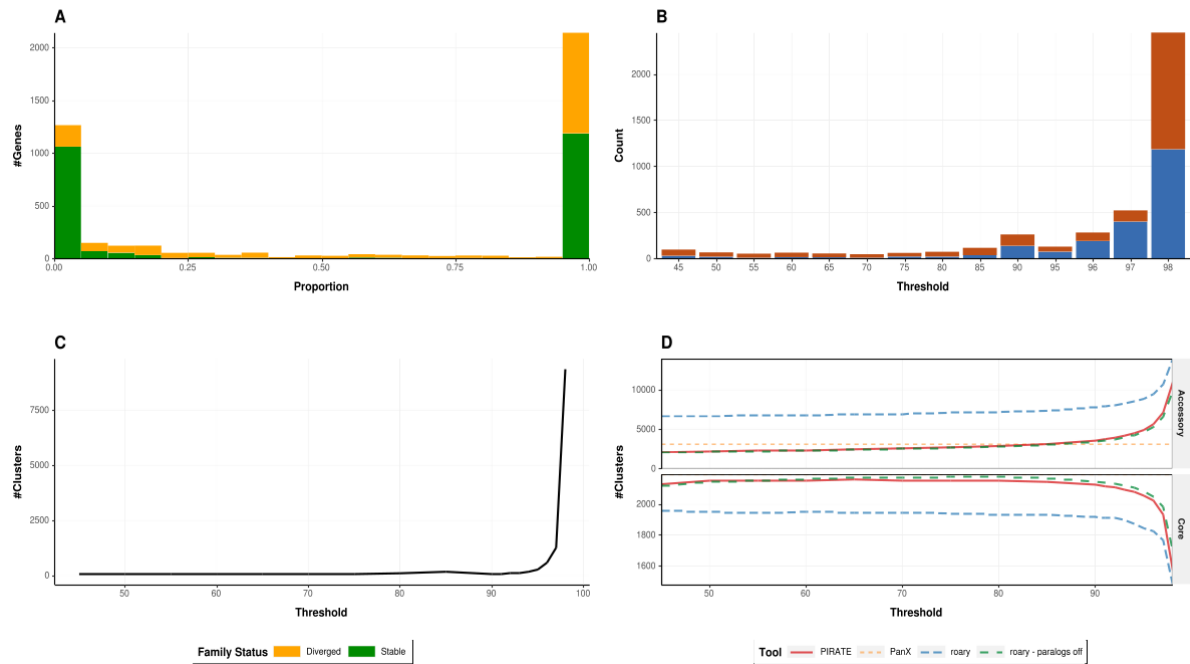

225 Figure 3. Descriptive figures of the pangenome of 253 complete *Staphylococcus aureus* genomes inferred using  
 226 PIRATE. PIRATE was run with default parameters over a range of amino acid identity values (45-98 %). (A)  
 227 The proportion of genomes in which gene families are found, indicating stable gene families (green) with  
 228 a single allele at 98% amino acid identity, and diverged with >1 allele (yellow). (B) The minimum amino acid %  
 229 identity cutoff at which all loci were present per gene family (core = blue, accessory = red). (C) The number of  
 230 unique alleles at each amino acid percentage threshold. A unique allele is characterised as the highest percentage  
 231 identity threshold at which a unique sub-cluster of isolates from a single gene family was identified by MCL.  
 232 (D) Comparison of core and accessory gene/allele estimates for PIRATE (red), PanX (orange), Roary (blue) and  
 233 Roary with paralog splitting switched off (green). The estimates represent 'allelic' variation reported by PIRATE  
 234 in contrast to 'gene content' variation reported by the other tools. PanX provided a single estimate of core and  
 235 accessory genome content as it has no analogous command to -s in PIRATE or -i in Roary to allow comparison.  
 236 Core gene families are characterised as being present in greater than 95% of genomes. All tools were run on  
 237 default parameters. Roary was run over a range of thresholds matching those used for PIRATE with and without  
 238 paralog splitting (-s).

239 A steep increase in the number of unique clusters per threshold (allelic diversity) of the sample was  
 240 observed at thresholds greater than 90% (Figure 3.C). At these thresholds allelic variation will begin  
 241 to influence the identification of gene families in analogous tools [2,7-8]. In addition to this metric,  
 242 PIRATE identifies the highest threshold at which all loci in a gene family cluster together. This value  
 243 can be used to estimate the sequence similarity threshold at which alleles are classified as 'genes' by  
 244 analogous tools (before paralog processing) and therefore allows for evaluation of the influence of  
 245 this choice on core and accessory genome sizes (Figure 3.D). For comparison, Roary and PanX were  
 246 applied to the *S. aureus* dataset (default settings). Roary was run at a range of percentage identity  
 247 thresholds matching those used by PIRATE (-i option) to facilitate comparison. Paralog splitting in  
 248 Roary was also switched off (-s option) to assess the influence of paralog splitting on the resulting  
 249 pangenome size estimates. The number of core and accessory genes (<95% isolates) estimated by  
 250 both tools was compared to those estimated using PIRATE (Figure 3.D). All tools give similar  
 251 estimates of the number of core genes (PIRATE = 2141, PanX = 2191, Roary (-i 45) = 1959, Roary no  
 252 paralogs (-i 45) = 2118). However, estimates of the number of accessory genes were divergent  
 253 (PIRATE = 2190, PanX = 3097, Roary (-i 45) = 6620, Roary no paralogs (-i 45) = 2046). The large  
 254 increase in the size of the accessory genome content inferred using Roary is primarily due to the post-  
 255 processing (paralog splitting) of accessory genes and has also been described in previous studies [9].  
 256 An analysis of the clusters produced by the tools indicated that there was broad intersection between  
 257 methodologies when considering core genes, but that differences become more pronounced in the

258 intermediate and accessory pangenome (Supplementary Analysis, Supplementary Figure 9). The close  
259 approximation by PIRATE of accessory content variation in Roary without paralog splitting suggests  
260 that PIRATE can be used to provide accurate estimates of pangenome composition for analogous tools  
261 before paralog splitting.

262 For the *S. aureus* collection the estimated number of core genes remains fairly constant at thresholds  
263 below 90% and decreases sharply at thresholds greater than 95% (Figure 3.D). This suggests that the  
264 majority of the *S. aureus* core genome would be reconstructed by tools that identify genes as clusters  
265 of sequences with >10% amino acid sequence similarity. However, the impact of more conservative  
266 thresholds on the accessory genome is pronounced. A moderate increase in the number of alleles  
267 misidentified as low frequency genes was observed at thresholds <90% followed by a sharp increase  
268 at thresholds >90%. This suggests that, even at low homology thresholds, allelic diversity in highly  
269 divergent genes inflates the number of clusters incorrectly identified as ‘accessory’ genes when using  
270 only a single homology threshold. This effect is likely to be more pronounced in organisms with large  
271 accessory genomes due to a higher number of diversified gene families in the accessory genome.

272 Additional examples of real data processed using PIRATE have been included in the Supplementary  
273 Analysis to highlight application of the tool to large or diverse datasets (Supplementary Figures 7+8).  
274 PIRATE was applied to 48 draft genomes of *Prochlorococcus marinus*, a marine cyanobacteria with  
275 extremely diverse gene complement, and a collection of 497 complete genomes of assorted  
276 *Pseudomonas* species, a genus of Gram-negative Gammaproteobacteria with highly variable genome  
277 sizes.

## 278 **Conclusion**

279 Here we present PIRATE, a toolbox for pangenomic analysis of bacterial genomes, which provides a  
280 framework for exploring gene diversity by defining genes using relaxed sequence similarity  
281 thresholds. This pipeline builds upon existing tools using a novel methodology that can be applied to  
282 any annotated genomic feature. PIRATE identifies and categorizes duplicated and disrupted genes,  
283 estimates allelic diversity, scores gene divergence and contextualizes genes using a pangenome graph.  
284 We demonstrate that it compares favourably with other commonly used tools for pangenomic  
285 analysis, in both execution time and computational resources, and is fully compatible with software  
286 for downstream analysis and visualisation. Furthermore, it is scalable to multiprocessor environments  
287 and can be applied to large numbers of genomes on modest hardware. Together the enhanced core and  
288 accessory genome characterisation capability, and the practical implementation advantages, make  
289 PIRATE a potentially powerful tool in bacterial genomics - a field in which there is an urgent need for  
290 tools that are applicable to increasingly large and complex datasets.

## 291 **Acknowledgements**

292 We would like to thank everyone who has contributed to the development of PIRATE through testing  
293 and feedback.

## 294 **Funding**

295 This work has been supported by BBSRC/NERC grant BB/M026388/1 awarded to E.F and MRC grant  
296 MR/L015080/1 awarded to S.S.

297 *Conflict of Interest:* none declared.

## 298 **Authors Contributions**

299 S.B. developed the software and wrote the manuscript. H.A.T. and N.M.C. contributed to and tested the  
300 software. S.K.S. and E.J.F. provided guidance and contributed to the manuscript.

301

**303 References**

- 304 1. Sheppard SK, Guttman DS, Fitzgerald JR. Population genomics of bacterial host adaptation. *Nat Rev Genet.*  
305 2018;19:549–65.
- 306 2. Page AJ, Cummins CA, Hunt M, Wong VK, Reuter S, Holden MTG, et al. Roary: rapid large-scale prokaryote pan  
307 genome analysis. *Bioinformatics.* 2015;31:3691–3.
- 308 3. Thorpe HA, Bayliss SC, Sheppard SK, Feil EJ. Piggy: a rapid, large-scale pan-genome analysis tool for intergenic regions  
309 in bacteria. *Gigascience.* 2018;7:1–11.
- 310 4. Sahl JW, Caporaso JG, Rasko DA, Keim P. The large-scale blast score ratio (LS-BSR) pipeline: a method to rapidly  
311 compare genetic content between bacterial genomes. *PeerJ.* 2014;2:e332.
- 312 5. Li L, Stoeckert CJ Jr, Roos DS. OrthoMCL: identification of ortholog groups for eukaryotic genomes. *Genome Res.*  
313 2003;13:2178–89.
- 314 6. Ding W, Baumdicker F, Neher RA. panX: pan-genome analysis and exploration. *Nucleic Acids Res.* 2018;46:e5.
- 315 7. Sheppard SK, Jolley KA, Maiden MCJ. A Gene-By-Gene Approach to Bacterial Population Genomics: Whole Genome  
316 MLST of *Campylobacter*. *Genes .* 2012;3:261–77.
- 317 8. Méric G, Yahara K, Mageiros L, Pascoe B, Maiden MCJ, Jolley KA, et al. A reference pan-genome approach to  
318 comparative bacterial genomics: identification of novel epidemiological markers in pathogenic *Campylobacter*. *PLoS One.*  
319 2014;9:e92798.
- 320 9. Lees JA, Harris SR, Tonkin-Hill G, Gladstone RA, Lo SW, Weiser JN, et al. Fast and flexible bacterial genomic  
321 epidemiology with PopPUNK. *Genome Res.* 2019;29:304–16.
- 322 10. Denamur E, Matic I. Evolution of mutation rates in bacteria. *Mol Microbiol.* 2006;60:820–7.
- 323 11. Li W, Godzik A. Cd-hit: a fast program for clustering and comparing large sets of protein or nucleotide sequences.  
324 *Bioinformatics.* 2006;22:1658–9.
- 325 12. Buchfink B, Xie C, Huson DH. Fast and sensitive protein alignment using DIAMOND. *Nat Methods.* 2015;12:59–60.
- 326 13. Camacho C, Coulouris G, Avagyan V, Ma N, Papadopoulos J, Bealer K, et al. BLAST+: architecture and applications.  
327 *BMC Bioinformatics.* 2009;10:421.
- 328 14. Enright AJ, Van Dongen S, Ouzounis CA. An efficient algorithm for large-scale detection of protein families. *Nucleic  
329 Acids Res.* 2002;30:1575–84.
- 330 15. Katoh K, Misawa K, Kuma K-I, Miyata T. MAFFT: a novel method for rapid multiple sequence alignment based on fast  
331 Fourier transform. *Nucleic Acids Res.* 2002;30:3059–66.
- 332 16. Hadfield J, Croucher NJ, Goater RJ, Abudahab K, Aanensen DM, Harris SR. Phandango: an interactive viewer for  
333 bacterial population genomics. *Bioinformatics.* 2017;
- 334 17. Brynildsrud O, Bohlin J, Scheffer L, Eldholm V. Rapid scoring of genes in microbial pan-genome-wide association  
335 studies with Scoary. *Genome Biol.* 2016;17:238.
- 336 18. Argimón S, Abudahab K, Goater RJE, Fedosejev A, Bhai J, Glasner C, et al. Microreact: visualizing and sharing data for  
337 genomic epidemiology and phylogeography. *Microb Genom.* 2016;2:e000093.
- 338 19. Connor TR, Loman NJ, Thompson S, Smith A, Southgate J, Poplawski R, et al. CLIMB (the Cloud Infrastructure for  
339 Microbial Bioinformatics): an online resource for the medical microbiology community. *Microb Genom.* 2016;2:e000086.
- 340 20. Pruitt KD, Tatusova T, Maglott DR. NCBI reference sequences (RefSeq): a curated non-redundant sequence database of  
341 genomes, transcripts and proteins. *Nucleic Acids Res.* 2007;35:D61–5.





Click here to access/download  
**Supplementary Material**  
Supplementary\_Analysis.pdf





Click here to access/download  
**Supplementary Material**  
Supplementary\_Table\_2.tsv



Dr. Sion C. Bayliss  
Milner Centre for Evolution  
Department of Biology and Biochemistry  
University of Bath  
Claverton Down  
Bath BA2 7AY  
UK

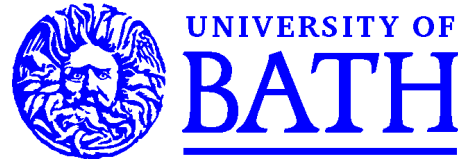

29/07/2019

E-mail: [s.bayliss@bath.ac.uk](mailto:s.bayliss@bath.ac.uk)

Tel: +44 (0)7838 072372

Dear Editor,

Please find enclosed the manuscript titled 'PIRATE: A fast and scalable pangenomics toolbox for clustering diverged orthologues in bacteria', which we would like to be considered for publication as an Technical Note in Gigascience. In this manuscript we describe PIRATE, a software toolbox for pangenomic analysis of bacterial genomes, which provides a framework for exploring the high diversity of genes observed in bacteria. PIRATE uses a novel approach, assessing clusters over a range of sequence similarity thresholds, to define gene orthologues. The software, made freely available for download from Github, identifies and categorizes duplicated and disrupted genes, estimates allelic diversity, scores gene divergence and contextualizes genes using a pangenome graph. PIRATE builds upon existing tools, in both speed and scope, and provides novel and complementary features that can be applied to any annotated genomic feature. In this manuscript we describe the underlying method and demonstrate the utility using a reference collection of *Staphylococcus aureus* genomes, highlighting how the identification of divergent core genes leads to a more conservative estimate of pangenome size. We additionally apply PIRATE to other large and diverse datasets for the purposes of both benchmarking and in order to illustrate the potential applications of the software. Given the rapid technological advances in sequencing technology and the ever expanding number of genomes available from diverse species, PIRATE represents a timely application that will be of broad interest to researchers interested in the field of bacterial genomics.

Yours sincerely,  
Dr Sion C. Bayliss, on behalf of all co-authors.
