# Supplementary material for: PIRATE: A fast and scalable pangenomics toolbox for clustering diverged orthologues in bacteria
Source: PubMed Central journal article supplement (PMC6785682; doi:10.1093/gigascience/giz119), 2019-10-09
Supplement: giz119_giga-d-19-00122_revision_3.pdf [file giz119_giga-d-19-00122_revision_3.pdf]

# GigaScience

## PIRATE: A fast and scalable pangenomics toolbox for clustering diverged orthologues in bacteria

--Manuscript Draft--

|                                                      |                                                                                                                                                                                                                                                                                                                                                                                                                                                                                                                                                                                                                                                                                                                                                                                                                                                                                                                                                                                                                                                                                                                                                                                                                                                                                     |                      |
|------------------------------------------------------|-------------------------------------------------------------------------------------------------------------------------------------------------------------------------------------------------------------------------------------------------------------------------------------------------------------------------------------------------------------------------------------------------------------------------------------------------------------------------------------------------------------------------------------------------------------------------------------------------------------------------------------------------------------------------------------------------------------------------------------------------------------------------------------------------------------------------------------------------------------------------------------------------------------------------------------------------------------------------------------------------------------------------------------------------------------------------------------------------------------------------------------------------------------------------------------------------------------------------------------------------------------------------------------|----------------------|
| <b>Manuscript Number:</b>                            | GIGA-D-19-00122R3                                                                                                                                                                                                                                                                                                                                                                                                                                                                                                                                                                                                                                                                                                                                                                                                                                                                                                                                                                                                                                                                                                                                                                                                                                                                   |                      |
| <b>Full Title:</b>                                   | PIRATE: A fast and scalable pangenomics toolbox for clustering diverged orthologues in bacteria                                                                                                                                                                                                                                                                                                                                                                                                                                                                                                                                                                                                                                                                                                                                                                                                                                                                                                                                                                                                                                                                                                                                                                                     |                      |
| <b>Article Type:</b>                                 | Technical Note                                                                                                                                                                                                                                                                                                                                                                                                                                                                                                                                                                                                                                                                                                                                                                                                                                                                                                                                                                                                                                                                                                                                                                                                                                                                      |                      |
| <b>Funding Information:</b>                          | Biotechnology and Biological Sciences Research Council (BB/M026388/1)                                                                                                                                                                                                                                                                                                                                                                                                                                                                                                                                                                                                                                                                                                                                                                                                                                                                                                                                                                                                                                                                                                                                                                                                               | Dr Edward J Feil     |
|                                                      | Medical Research Council (MR/L015080/1)                                                                                                                                                                                                                                                                                                                                                                                                                                                                                                                                                                                                                                                                                                                                                                                                                                                                                                                                                                                                                                                                                                                                                                                                                                             | Dr Samuel K Sheppard |
| <b>Abstract:</b>                                     | <p>Cataloguing the distribution of genes within natural bacterial populations is essential for understanding evolutionary processes and the genetic basis of adaptation. Here we present a pangenomics toolbox, PIRATE (Pangenome Iterative Refinement And Threshold Evaluation), which identifies and classifies orthologous gene families in bacterial pangenomes over a wide range of sequence similarity thresholds. PIRATE builds upon recent scalable software developments to allow for the rapid interrogation of thousands of isolates. PIRATE clusters genes (or other annotated features) over a wide range of amino-acid or nucleotide identity thresholds and uses the clustering information to rapidly identify paralogous gene families and putative fission/fusion events. Furthermore, PIRATE orders the pangenome using a directed graph, provides a measure of allelic variation and estimates sequence divergence for each gene family. We demonstrate that PIRATE scales linearly with both number of samples and computation resources, allowing for analysis of large genomic datasets, and compares favorably to other popular tools. PIRATE provides a robust framework for analysing bacterial pangenomes, from largely clonal to panmictic species.</p> |                      |
| <b>Corresponding Author:</b>                         | Sion C Bayliss, Ph.D<br>University of Bath<br>UNITED KINGDOM                                                                                                                                                                                                                                                                                                                                                                                                                                                                                                                                                                                                                                                                                                                                                                                                                                                                                                                                                                                                                                                                                                                                                                                                                        |                      |
| <b>Corresponding Author Secondary Information:</b>   |                                                                                                                                                                                                                                                                                                                                                                                                                                                                                                                                                                                                                                                                                                                                                                                                                                                                                                                                                                                                                                                                                                                                                                                                                                                                                     |                      |
| <b>Corresponding Author's Institution:</b>           | University of Bath                                                                                                                                                                                                                                                                                                                                                                                                                                                                                                                                                                                                                                                                                                                                                                                                                                                                                                                                                                                                                                                                                                                                                                                                                                                                  |                      |
| <b>Corresponding Author's Secondary Institution:</b> |                                                                                                                                                                                                                                                                                                                                                                                                                                                                                                                                                                                                                                                                                                                                                                                                                                                                                                                                                                                                                                                                                                                                                                                                                                                                                     |                      |
| <b>First Author:</b>                                 | Sion C Bayliss, Ph.D                                                                                                                                                                                                                                                                                                                                                                                                                                                                                                                                                                                                                                                                                                                                                                                                                                                                                                                                                                                                                                                                                                                                                                                                                                                                |                      |
| <b>First Author Secondary Information:</b>           |                                                                                                                                                                                                                                                                                                                                                                                                                                                                                                                                                                                                                                                                                                                                                                                                                                                                                                                                                                                                                                                                                                                                                                                                                                                                                     |                      |
| <b>Order of Authors:</b>                             | Sion C Bayliss, Ph.D                                                                                                                                                                                                                                                                                                                                                                                                                                                                                                                                                                                                                                                                                                                                                                                                                                                                                                                                                                                                                                                                                                                                                                                                                                                                |                      |
|                                                      | Harry A Thorpe                                                                                                                                                                                                                                                                                                                                                                                                                                                                                                                                                                                                                                                                                                                                                                                                                                                                                                                                                                                                                                                                                                                                                                                                                                                                      |                      |
|                                                      | Nicola M Coyle                                                                                                                                                                                                                                                                                                                                                                                                                                                                                                                                                                                                                                                                                                                                                                                                                                                                                                                                                                                                                                                                                                                                                                                                                                                                      |                      |
|                                                      | Samuel K Sheppard                                                                                                                                                                                                                                                                                                                                                                                                                                                                                                                                                                                                                                                                                                                                                                                                                                                                                                                                                                                                                                                                                                                                                                                                                                                                   |                      |
|                                                      | Edward J Feil                                                                                                                                                                                                                                                                                                                                                                                                                                                                                                                                                                                                                                                                                                                                                                                                                                                                                                                                                                                                                                                                                                                                                                                                                                                                       |                      |
| <b>Order of Authors Secondary Information:</b>       |                                                                                                                                                                                                                                                                                                                                                                                                                                                                                                                                                                                                                                                                                                                                                                                                                                                                                                                                                                                                                                                                                                                                                                                                                                                                                     |                      |
| <b>Response to Reviewers:</b>                        | <p>The manuscript has been attached as a .docx formatted file. PDF also attached.</p> <p>Editor Notes:</p> <p>1) Please add the GigaDB DOI link to your reference [19] in the bibliography (<a href="http://dx.doi.org/10.5524/100645">http://dx.doi.org/10.5524/100645</a>):<br/>Added to reference.</p>                                                                                                                                                                                                                                                                                                                                                                                                                                                                                                                                                                                                                                                                                                                                                                                                                                                                                                                                                                           |                      |

|                                                                                                                                                                                                                                                                                                                                                                                                                                                                                                             |                                                                                                                                                                                                                                                  |
|-------------------------------------------------------------------------------------------------------------------------------------------------------------------------------------------------------------------------------------------------------------------------------------------------------------------------------------------------------------------------------------------------------------------------------------------------------------------------------------------------------------|--------------------------------------------------------------------------------------------------------------------------------------------------------------------------------------------------------------------------------------------------|
|                                                                                                                                                                                                                                                                                                                                                                                                                                                                                                             | 2) Please add a sentence at the end of your "software availability" section along the lines of: "An archival copy of the code, scripts and other supporting data are also available via the GigaScience database GigaDB [19]."<br>Added in text. |
| <b>Additional Information:</b>                                                                                                                                                                                                                                                                                                                                                                                                                                                                              |                                                                                                                                                                                                                                                  |
| <b>Question</b>                                                                                                                                                                                                                                                                                                                                                                                                                                                                                             | <b>Response</b>                                                                                                                                                                                                                                  |
| Are you submitting this manuscript to a special series or article collection?                                                                                                                                                                                                                                                                                                                                                                                                                               | No                                                                                                                                                                                                                                               |
| <b>Experimental design and statistics</b>                                                                                                                                                                                                                                                                                                                                                                                                                                                                   | Yes                                                                                                                                                                                                                                              |
| <p>Full details of the experimental design and statistical methods used should be given in the Methods section, as detailed in our <a href="#">Minimum Standards Reporting Checklist</a>. Information essential to interpreting the data presented should be made available in the figure legends.</p> <p>Have you included all the information requested in your manuscript?</p>                                                                                                                           |                                                                                                                                                                                                                                                  |
| <b>Resources</b>                                                                                                                                                                                                                                                                                                                                                                                                                                                                                            | Yes                                                                                                                                                                                                                                              |
| <p>A description of all resources used, including antibodies, cell lines, animals and software tools, with enough information to allow them to be uniquely identified, should be included in the Methods section. Authors are strongly encouraged to cite <a href="#">Research Resource Identifiers</a> (RRIDs) for antibodies, model organisms and tools, where possible.</p> <p>Have you included the information requested as detailed in our <a href="#">Minimum Standards Reporting Checklist</a>?</p> |                                                                                                                                                                                                                                                  |
| <b>Availability of data and materials</b>                                                                                                                                                                                                                                                                                                                                                                                                                                                                   | Yes                                                                                                                                                                                                                                              |
| <p>All datasets and code on which the conclusions of the paper rely must be either included in your submission or deposited in <a href="#">publicly available repositories</a> (where available and ethically appropriate), referencing such data using</p>                                                                                                                                                                                                                                                 |                                                                                                                                                                                                                                                  |

a unique identifier in the references and in the “Availability of Data and Materials” section of your manuscript.

Have you have met the above requirement as detailed in our [Minimum Standards Reporting Checklist](#)?

[Click here to view linked References](#)

# 1 **PIRATE: A fast and scalable pangenomics toolbox for clustering diverged** 2 **orthologues in bacteria**

3 Sion C. Bayliss<sup>1\*</sup>, Harry A. Thorpe<sup>1</sup>, Nicola M. Coyle<sup>1</sup>, Samuel K. Sheppard<sup>1</sup> and Edward J. Feil<sup>1</sup>

4 <sup>1</sup>The Milner Centre for Evolution, Department of Biology and Biochemistry, University of Bath, Bath BA2 7AY

5 \*To whom correspondence should be addressed.

6

## 7 **Abstract**

8 Cataloguing the distribution of genes within natural bacterial populations is essential for  
9 understanding evolutionary processes and the genetic basis of adaptation. Here we present a  
10 pangenomics toolbox, PIRATE (Pangenome Iterative Refinement And Threshold Evaluation), which  
11 identifies and classifies orthologous gene families in bacterial pangenomes over a wide range of  
12 sequence similarity thresholds. PIRATE builds upon recent scalable software developments to allow  
13 for the rapid interrogation of thousands of isolates. PIRATE clusters genes (or other annotated  
14 features) over a wide range of amino-acid or nucleotide identity thresholds and uses the clustering  
15 information to rapidly identify paralogous gene families and putative fission/fusion events.  
16 Furthermore, PIRATE orders the pangenome using a directed graph, provides a measure of allelic  
17 variation and estimates sequence divergence for each gene family. We demonstrate that PIRATE  
18 scales linearly with both number of samples and computation resources, allowing for analysis of large  
19 genomic datasets, and compares favorably to other popular tools. PIRATE provides a robust  
20 framework for analysing bacterial pangenomes, from largely clonal to panmictic species.

21 **Availability:** PIRATE is implemented in Perl and is freely available under a GNU GPL 3 open source  
22 license from <https://github.com/SionBayliss/PIRATE>. PIRATE is available as a software application  
23 in the SciCrunch.org database (RRID SCR\_017265).

24 **Contact:** s.bayliss@bath.ac.uk

25 **Keywords:** Microbial genomics, pangenomics, next-generation sequencing, bioinformatics.

26 **Supplementary Information:** Supplementary data is available online.

## 27 **Background**

28 For most bacteria the complement of genes for a given species is far greater than the number of genes  
29 in any one strain. Comprising core genes shared by all individuals in a species and accessory genes  
30 that are variously present or absent, the pangenome represents a pool of genetic variation that  
31 underlies the enormous phenotypic variation observed in many bacterial species. Through horizontal  
32 gene transfer, bacteria can acquire genes from this pangenome pool that bestow important traits such  
33 as virulence or antimicrobial resistance [\[1\]](#).

34 Over the last decade, advances in whole genome sequencing technologies and bioinformatic analyses  
35 have allowed the cataloguing of genes and intergenic regions that make up the pangenomes of many  
36 species [\[2–9\]](#).

37 Current approaches define genes on the basis of strict sequence identity thresholds [\[2,3,7,8\]](#), e-value  
38 cutoffs [\[5,6\]](#) and bit score ratios [\[4\]](#). However, genes accrue variation at different rates under the  
39 influence of positive and purifying selection [\[10\]](#). Therefore, it is difficult to define a single identity  
40 threshold beyond which genes cease to belong to the same family. Relaxed thresholds risk over-  
41 clustering of related gene families, whilst conservative thresholds risk over-splitting, by  
42 misclassifying highly divergent alleles of the same gene into multiple clusters. Over-splitting is likely  
43 to be especially problematic in vertically acquired core genes that have undergone strong diversifying  
44 selection or horizontally acquired accessory genes from multiple source populations which share a  
45 distant common ancestor. The impact of over- and under-clustering is relevant to consider in the  
46 context of downstream research applications. Under-clustering (or over-splitting) can create a  
47 misleading impression of pangenome diversity and composition when considering how much gene  
48 diversity exists in the accessory genome [\[9\]](#). However, for a study identifying genetic determinants  
49 associated with a phenotype, such as antibiotic resistance, core and accessory allelic variation which  
50 has been misclassified as additional accessory genes may have little to no impact as the causative  
51 genes in question may still be correctly identified.

52 In order to address these considerations we have created the Pangenome Iterative Refinement And  
53 Threshold Evaluation (PIRATE) toolbox which evaluates and classifies genetic diversity within the  
54 pangenome. PIRATE provides the means to create pangenomes from any annotated features (e.g.  
55 CDS, tRNA, rRNA) over a user-defined range of amino acid or nucleotide identity thresholds.  
56 PIRATE provides measures of sequence divergence and allelic diversity within the sample. PIRATE  
57 also categorises paralogs into duplication and/or fission loci, loci disrupted by an insertion, deletion or  
58 nonsense mutation. A consistent nomenclature is applied to allow for the user to identify gene clusters  
59 which are the product of duplication or fission events, providing additional context on both  
60 methodological and evolutionary gene provenance. This rapid, scalable method allows for a  
61 comprehensive overview of gene content and allelic diversity within the pangenome.

## 62 Methods

### 63 Pangenome Construction

64 The PIRATE pipeline has been summarised as a schematic in Figure 1.A. The input is a set of GFF3  
65 files. Feature sequences are filtered and the dataset is reduced by iterative clustering using CD-HIT  
66 [2,11]. The longest sequence from each CD-HIT cluster is used as a representative for sequence  
67 similarity searching (BLAST/DIAMOND) [12,13]. The normalised bit scores of the resulting all-vs-  
68 all comparisons are clustered using MCL after removing hits which fall below a relaxed threshold of  
69 percentage identity (default: 50%) [14]. A default MCL inflation value of 2 was identified as  
70 appropriate for intra-species clustering by this study and previous authors [2]. A larger inflation value  
71 may be appropriate for inter-species comparisons and can be modified as appropriate. The initial  
72 clustering at this lower bounds threshold is used to define putative ‘gene families’ (Figure 1.B). Initial  
73 designations may not represent the final outputs as families containing paralogs maybe subsequently  
74 split during the paralog splitting step. MCL clustering is repeated over a range of user specified  
75 percentage identity thresholds (default 50-95% amino acid identity, increments of 5). Unique MCL  
76 clusters at higher thresholds are used to identify ‘unique alleles’ (Figure 1.B). Loci may be shared  
77 between multiple unique alleles (MCL clusters) at different percentage identity thresholds (e.g. Figure  
78 1.B – Family B). PIRATE uses the highest threshold at which a ‘unique allele’ is observed to define  
79 the shared percentage identity in the resulting outputs.

80

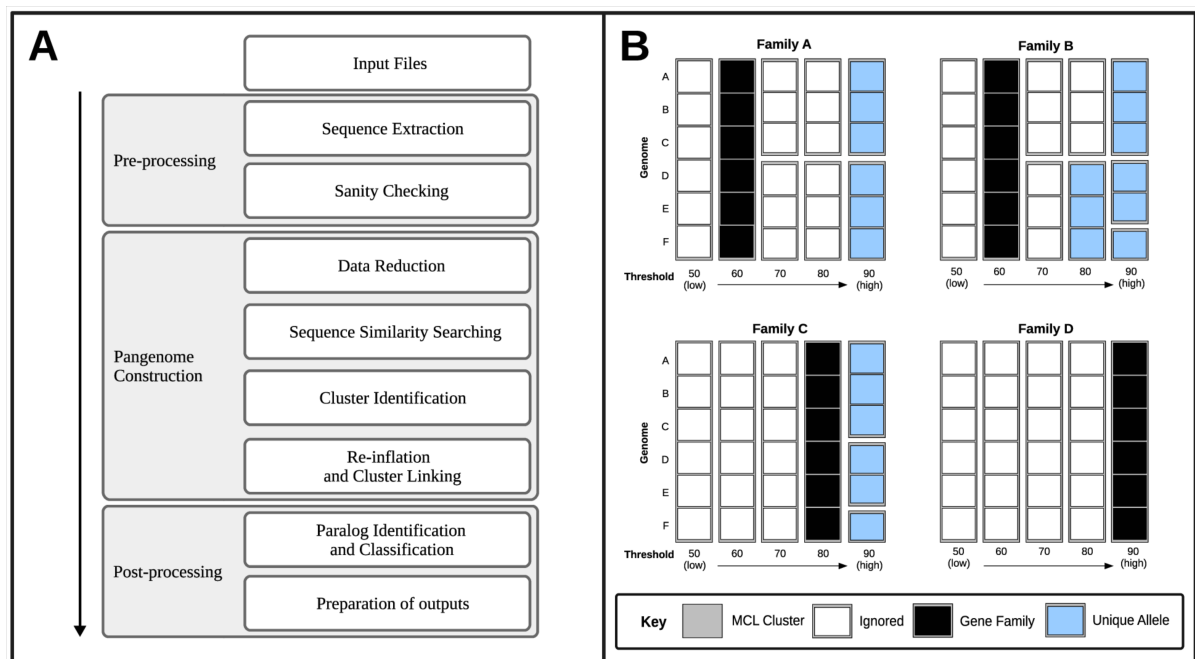

82 Figure 1. (A) Flow chart denoting a simplified workflow. (B) Example cluster classification. Blocks represent  
83 sequences from unique genomes. Grey blocks represent MCL clusters at various percentage identity cut-offs.  
84 Black squares indicate a ‘gene family’ cluster, the lowest %id threshold from the MCL clustering. Blue squares  
85 represent ‘unique alleles’, MCL clusters at higher % identity thresholds with unique combinations of sequences  
86 (at the higher threshold at which they are observed together). White squares represent redundant MCL clusters,  
87 these are not present in the PIRATE output.

## 88 ***Paralog Classification***

89 Clusters which contain more than one sequence per individual genome are putative paralogs and  
90 undergo an additional post-processing step (Supplementary Figure 6). All loci are clustered on the  
91 basis of sequence length (98% similar) using CD-HIT. Homology between representative loci is  
92 established using all-vs-all BLAST. Loci with no significant overlaps are considered putative fission  
93 loci and are compared against a reference sequence (the longest sequence in the gene family) which is  
94 considered the most ‘complete’ version of the gene. All combinations of putative fission loci are  
95 compared to the reference in order to find the combination which gives the most parsimonious  
96 coverage of the reference sequence. This combination locus is classified as a ‘fission locus’ that may  
97 have formed via gene disruption (e.g. insertion, deletion or nonsense mutation). Any locus which  
98 overlaps with all other loci or is not a part of a fission cluster is considered a duplication. The process  
99 is iterated until all loci have been classified.

## 100 ***Cluster Splitting***

101 After paralog classification, fission loci are treated as a single locus. Gene families that contain  
102 genomes with multiple loci, after accounting for fission loci, potentially represent two or more related  
103 gene families that have been over-clustered. In these cases the gene family is checked against the  
104 presence of MCL clusters (unique alleles) which contains a single copy of the loci in all constituent  
105 genomes (Supplementary Figure 6). These alleles are thereafter considered separate gene families  
106 with nomenclature denoting their shared provenance (e.g. g0001\_1, g0001\_2).

## 107 ***Post-processing***

108 Syntenic connections between gene families in their source genomes are used to create a pangenome  
109 graph. Parsimonious paths between gene families contained in the same number of genomes are used  
110 to identify co-localised gene families. This information is used to order the resulting tabular  
111 pangenome file on syntenic blocks of genes in descending order of number of genomes those blocks  
112 were present in. Gene-by-gene alignments are produced using MAFFT in order to generate a core  
113 gene alignment [15]. Installing the relevant dependencies in R allows for PIRATE to produce a pdf  
114 containing descriptive figures.

115 A number of supplementary tools are provided to extract, align and subset sequences, and to compare  
116 and visualize outputs. In order to facilitate integration with existing pipeline, scripts have been  
117 provided to convert the outputs of PIRATE into common formats which allows for them to be used as  
118 inputs to software used for downstream analysis, such as the PanX user-interface, SCOARY,  
119 Microreact or Phandango [6,16–18]. A full description of the methodology and comparative  
120 benchmarks has been provided in the supplementary information (Supplementary Information).

121  
122  
123  
124  
125  
126  
127  
128  
129

## 131 Results and Discussion

### 132 *Benchmarking and comparison to other tools*

133 The performance of PIRATE was assessed on a range of parameters related to its scalable application  
134 to large numbers of bacterial genomes. Three bacterial species were selected for comparison,  
135 *Campylobacter jejuni*, *Staphylococcus aureus* and *Escherichia coli*, representing both a range of  
136 pangenome sizes (small, medium and large respectively) and GC content (30.4%, 32.7% and 50.6%  
137 respectively)(Supplementary Table 2). The scripts used to perform these analyses are available from  
138 the GigaDB repository associated with the publication [19]. The settings used for each tool have been  
139 detailed in Supplementary Table 3. Memory usage and wall time were found to scale approximately  
140 linearly with increasing numbers of isolates and the amount of memory and time per sample was  
141 consistent (Supplementary Figures 1+3). PIRATE has been extensively parallelised and the  
142 availability of additional cores was found to significantly reduce runtime (Supplementary Figure 2).

143 A range of tools have been developed for constructing bacterial pangenomes. For comparison, we  
144 chose two of the most widely used packages, Roary and PanX [2,6]. These tools have some  
145 similarities to PIRATE that facilitate comparison; all three tools share similar clustering workflows  
146 (BLAST/DIAMOND, MCL) and require annotated genomes as input. Differences in methodology lie  
147 primarily in the post processing of clusters, Roary uses a single percentage identity threshold for MCL  
148 clustering and separates paralogs based upon their neighboring genes and PanX splits paralogous  
149 genes using an alignment/tree-based method rather than the CDHIT-BLAST approach used by  
150 PIRATE. Each of the three tools were applied to subsets of 50, 100, 150, 200 and 250 *Staphylococcus*  
151 *aureus* complete genomes downloaded from the RefSeq database (Supplementary Table 2), for  
152 comparisons on the same hardware using 8 cores [20]. It should be noted that both PIRATE and Roary  
153 include post-processing of paralogs in the comparison without alignment or phylogenetic tree  
154 reconstruction, producing a complete output. PanX does not do this, as alignment, followed by tree  
155 building, is a necessary step in paralog identification in this pipeline. Therefore, analyses were run  
156 with and without gene-by-gene alignment in order to make unbiased comparisons. Execution time and  
157 memory usage per sample were recorded (Figure 2). In order to aid comparison PanX was used with  
158 the -dmcdc flag which batches input genomes, clusters per batch and subsequently merges the batches.  
159 Without this option the run time of PanX scales quadratically and is inappropriate for larger datasets  
160 and comparison to the other tools.

161



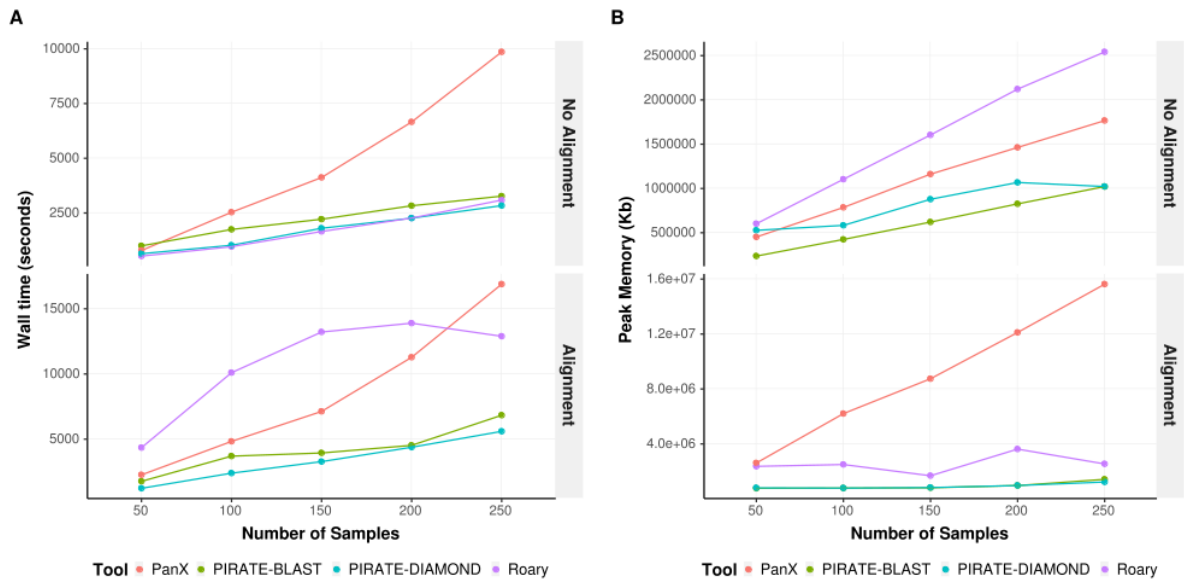

162 Figure 2. Benchmarking of PIRATE against Roary and PanX. Wall time (seconds) and peak memory usage (Kb)  
 163 were recorded for each tool run on a dataset of 50, 100, 150, 200 and 250 complete *Staphylococcus aureus*  
 164 genomes from the RefSeq database with and without gene-by-gene alignment.

165 The execution time of Roary and PIRATE scaled in an approximately linear manner with increasing  
 166 number of samples (Figure 2.A). Roary and PIRATE were faster than PanX at all time points without  
 167 gene-by-gene alignment. The execution time of PIRATE using DIAMOND was comparable to that of  
 168 Roary without gene-by gene alignment (Figure 2.A, top panel). Roary completed marginally quicker  
 169 than PIRATE using BLAST without gene-by-gene alignment at all sample sizes. When gene-by-gene  
 170 alignment was applied both Roary and PIRATE scaled sub-linearly with number of samples, however  
 171 PIRATE using DIAMOND or BLAST completed substantially faster than either Roary or PanX  
 172 (Figure 2.A, bottom panel). PIRATE exhibited lower memory usage than the other tools tested,  
 173 scaling sub-linearly with number of samples (Figure 2.B). In conclusion, PIRATE compared  
 174 favourably in both execution time and memory usage and these metrics suggest PIRATE can be  
 175 flexibly applied to large datasets on routinely available hardware.

### 176 **Application to real datasets**

177 PIRATE has been applied to three real datasets; *Staphylococcus aureus*, *Prochlorococcus marinus* and  
 178 *Pseudomonas*. *S. aureus*, a gram-positive human commensal and opportunistic pathogen, was used as  
 179 a benchmarking dataset for comparison to other tools. Additionally, PIRATE was applied to a further  
 180 two datasets to highlight its application to large or diverse pangenomes. PIRATE was applied to 45  
 181 draft genomes of *P. marinus*, a marine cyanobacteria with extremely diverse gene complement, and a  
 182 collection of 497 complete genomes of assorted *Pseudomonas* species, a genus of Gram-negative  
 183 *Gammaproteobacteria* which have highly variably sized genomes.

### 184 ***Staphylococcus aureus***

185 PIRATE was applied to 253 complete *Staphylococcus aureus* genomes downloaded from the RefSeq  
 186 database (accessed: 08/11/18) (Supplementary Table 2) [21]. PIRATE was run on default settings over  
 187 a wide range of amino acid percentage identity thresholds (45, 50, 60, 65, 70, 75, 80, 85, 90, 91-99 in  
 188 increments of 1%) (Supplementary Table 2). The pangenome of *S. aureus* comprised 4250 gene

189 families of which 2433 (57.25 %) were classified as core (>95% genomes) and 1817 (42.75 %) as  
 190 accessory (Figure 3.A). Gene families with an average copy number greater than 1.25 loci per genome  
 191 after paralog classification were excluded from further analysis (178 gene families, 4.18 %) as direct  
 192 comparison between high copy number or potentially over-clustered families is problematic. Of the  
 193 remaining 4072 gene families, 740 (18.17 %) clustered at thresholds of less than 95% percentage  
 194 identity. At these thresholds a significantly different number of ‘divergent’ gene families were  
 195 observed (Chi Squared test p-value = < 0.0001) between core and accessory genomes; 21.83 % of  
 196 accessory genes (383/1754) clustered at less than 95% homology compared to only 15.40 % of core  
 197 genes (357/2318) (Figure 3.B). A possible explanation for this is that the accessory genes may have  
 198 been horizontally acquired and therefore may be from diverse genetic backgrounds with different  
 199 evolutionary histories.

200 PIRATE can quickly be used to identify genes with both highly conserved or divergent sequence  
 201 similarity or variable copy number. The biological ramifications of these genes will vary between  
 202 applications. For example the core ‘accessory regulator’ *agr* locus exhibited a range of sequence  
 203 identity clustering thresholds; *agrA* clusters at 91 %, *agrB* and *agrC* at 65 % and *agrD* at 45 % amino  
 204 acid identity, each with a copy number of 1. We identified that another gene, *arlR*, which is known to  
 205 interact with the *agr* locus, has a similarly low amino acid similarity of 45 % perhaps implying that  
 206 the linked genes have undergone similar patterns of diversifying selection. This example highlights  
 207 how diversification may lead to over-splitting of genes if only a single sequence identity threshold  
 208 were used, even if this threshold were applicable to the vast majority of genes in the pangenome.  
 209 Expansion of families of MGEs or individual genes within the population can also be identified from  
 210 the outputs. For example, IS256, known to play a role in biofilm formation and resistance to various  
 211 antimicrobials, is present in 35 genomes, has a conserved amino acid sequence (<2% divergence) but  
 212 a variable copy number of between 1 to 32 copies within the genomes in which it is present. Using  
 213 these data it is possible to identify the strains which have an increased dosage of IS256.

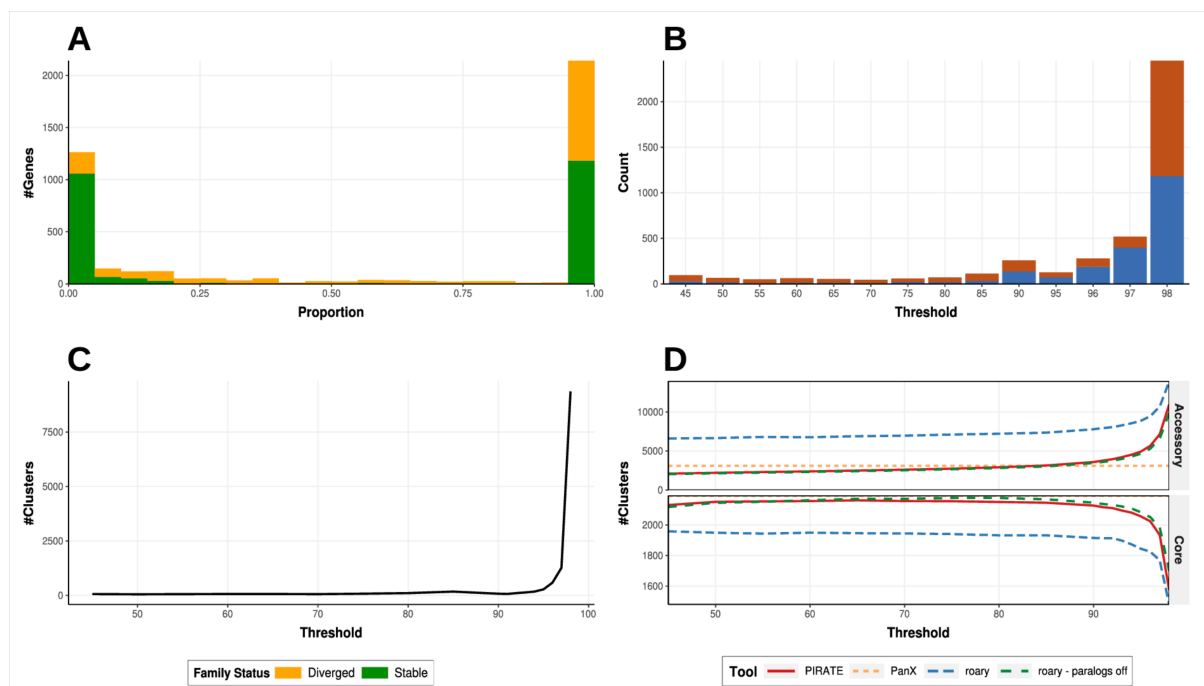

214 Figure 3. Descriptive figures of the pangenome of 253 complete *Staphylococcus aureus* genomes inferred using  
 215 PIRATE. PIRATE was run with default parameters over a range of amino acid identity values (45-98 %). (A)  
 216 The proportion of genomes in which gene families are found, indicating stable gene families (green) with a

217 single allele at 98% amino acid identity, and diverged with >1 allele (yellow). (B) The minimum amino acid %  
218 identity cutoff at which all loci were present per gene family (core = blue, accessory = red). (C) The number of  
219 unique alleles at each amino acid percentage threshold. A unique allele is characterised as the highest percentage  
220 identity threshold at which a unique sub-cluster of isolates from a single gene family was identified by MCL.  
221 (D) Comparison of core and accessory gene/allele estimates for PIRATE (red), PanX (orange), Roary (blue) and  
222 Roary with paralog splitting switched off (green). The estimates represent 'allelic' variation reported by PIRATE  
223 in contrast to 'gene content' variation reported by the other tools. PanX provided a single estimate of core and  
224 accessory genome content as it has no analogous command to -s in PIRATE or -i in Roary to allow comparison.  
225 Core gene families are characterised as being present in greater than 95% of genomes. All tools were run on  
226 default parameters. Roary was run over a range of thresholds matching those used for PIRATE with and without  
227 paralog splitting (-s).

228 A steep increase in the number of unique clusters per threshold (allelic diversity) of the sample was  
229 observed at thresholds greater than 90% (Figure 3.C). At these thresholds allelic variation will begin  
230 to influence the identification of gene families in analogous tools [2,7-8]. In addition to this metric,  
231 PIRATE identifies the highest threshold at which all loci in a gene family cluster together. This value  
232 can be used to estimate the sequence similarity threshold at which alleles are classified as 'genes' by  
233 analogous tools (before paralog processing) and therefore allows for evaluation of the influence of  
234 this choice on core and accessory genome sizes (Figure 3.D). For comparison, Roary and PanX were  
235 applied to the *S. aureus* dataset (default settings). Roary was run at a range of percentage identity  
236 thresholds matching those used by PIRATE (-i option) to facilitate comparison. Paralog splitting in  
237 Roary was also switched off (-s option) to assess the influence of paralog splitting on the resulting  
238 pangenome size estimates. The number of core and accessory genes (<95% isolates) estimated by  
239 both tools was compared to those estimated using PIRATE (Figure 3.D). All tools give similar  
240 estimates of the number of core genes (PIRATE = 2141, PanX = 2191, Roary (-i 45) = 1959, Roary no  
241 paralogs (-i 45) = 2118). However, estimates of the number of accessory genes were divergent  
242 (PIRATE = 2190, PanX = 3097, Roary (-i 45) = 6620, Roary no paralogs (-i 45) = 2046).

243 For the *S. aureus* collection the estimated number of core genes remains fairly constant at thresholds  
244 below 90% and decreases sharply at thresholds greater than 95% (Figure 3.D). This suggests that the  
245 majority of the *S. aureus* core genome would be reconstructed by tools that identify genes as clusters  
246 of sequences with >10% amino acid sequence similarity. However, the impact of more conservative  
247 thresholds on the accessory genome is pronounced. A moderate increase in the number of alleles  
248 misidentified as low frequency genes was observed at thresholds <90% followed by a sharp increase  
249 at thresholds >90%. This suggests that, even at low identity thresholds, allelic diversity in highly  
250 divergent genes inflates the number of clusters incorrectly identified as 'accessory' genes when using  
251 only a single homology threshold. This effect is likely to be more pronounced in organisms with large  
252 accessory genomes due to a higher number of diversified gene families in the accessory genome.

253 The outputs from the three tools were compared to identify the differences in the gene clusters that  
254 they produced. Loci not present in all outputs, due to tool-specific input sequence filters, were  
255 removed. PIRATE produced 4,247 clusters, PanX 5,193 and Roary 10,454 clusters. The clusters were  
256 compared in a pairwise manner between tools and the number of matching clusters were identified  
257 (Supplementary Figure 7). Clusters were considered matching when they contained the same loci and  
258 were +/-5% the size (number of loci) of the query cluster. The relaxed cluster size threshold (+/-5%)  
259 was applied to allowed for minor discrepancies between the clusterings that were unlikely to  
260 significantly impact on the interpretation of results. The majority of clusters matched between  
261 PIRATE and PanX (PanX:PIRATE = 3515/5193 [67.69 %], PIRATE-PanX = 3456/4247 [81.38 %]).  
262 Many of mismatches occurred in the accessory or intermediate pangenome. The greater number of

263 PIRATE clusters identified in the PanX output was likely due to the less aggressive paralog splitting  
264 algorithm and co-clustering of truncated genes (fission/fusion genes) used by PIRATE. The majority  
265 (~70%) of PIRATE and PanX clusters were found in the output of Roary (PanX:Roary = 3736/5193  
266 [71.94 %], PIRATE:Roary = 2979/4247 [70.14 %]), suggesting that a large proportion of core genes  
267 were found by all tools. The smallest number of matching clusters (~25 %) were between Roary and  
268 the clusters identified by the other tools (Roary:PanX = 3029/10454 [28.97 %],  
269 Roary:PIRATE=2419/10454 [23.14 %]) and most of these mismatches were observed in accessory  
270 clusters. We would suggest that this is due to the aggressive splitting of paralogous genes in Roary,  
271 the implications of which have been documented by previous authors [9].

272 These results suggest that there was a large intersection in the core gene clusters and, to a lesser  
273 extent, accessory clusters, of the three tools studied. However, the tools varied in the identification of  
274 shared clusters in the intermediate and accessory pangenomes. This difference was more pronounced  
275 in accessory genes identified by Roary than between PIRATE and PanX. The vast majority of the  
276 differences in clustering between tools in most likely due to the different paralog splitting  
277 methodologies employed. Other variations in methodology, such as the 'divide-and-conquer' strategy  
278 employed by PanX or the co-clustering of fission/fusion genes by PIRATE, may also contribute to this  
279 variation to a lesser extent. The close approximation by PIRATE of accessory content variation in  
280 Roary without paralog splitting suggests that PIRATE can be used to provide accurate estimates of  
281 pangenome composition for analogous tools before paralog splitting.

## 282 *Pseudomonas Species*

283 PIRATE was applied to a dataset of 496 complete genomes of assorted, uncharacterized  
284 *Pseudomonas* species from the NCBI database (Supplementary Table 2)[21]. The pangenome of the  
285 *Pseudomonas* collection was reconstructed, including gene-by-gene sequence alignment, in 188,216s  
286 (52.3h) using 12 threads, an MCL inflation value of 6 and a HSP query length threshold of 0.9. The  
287 pangenome comprised of 2,858,820 loci clustered into 102,425 gene clusters of which 1841 (1.8 %)  
288 were considered core (present in >95% of isolates) (Figure 4.A). An increase in the frequency of  
289 genes present in ~40% of the isolates corresponded to 'lineage core' genes from an overrepresented  
290 lineage (Figure 4.C, dotted blue box). The number of unique alleles per genome increased at  
291 percentage identities thresholds >70 %, most likely representing inter-species/lineage divergence, and  
292 increased sharply at thresholds >94-95% (Figure 4.B). This rise was consistent with the sharp increase  
293 of intra-species allelic diversity observed in other datasets investigated within this study (Figure 4.B).  
294 *Pseudomonas* had an extremely variable genome size (4.7-11 Mb) which was reflected in the number  
295 of genes present per isolate (Figure 4.C). There was an observable relationship between genetic  
296 relatedness and number of genes per isolate with considerable within-lineage variation. This is most  
297 clearly observable in the most numerous lineage present in the collection (Figure 4.C, dotted blue  
298 box) which contained between 5000-7000 genes per isolate. Whilst there were a large number of  
299 'lineage core' genes present in *Pseudomonas* species, there were also a number of promiscuous genes  
300 intermittently present or absent across all *Pseudomonas* genomes analysed (Figure 4.D).

301

303

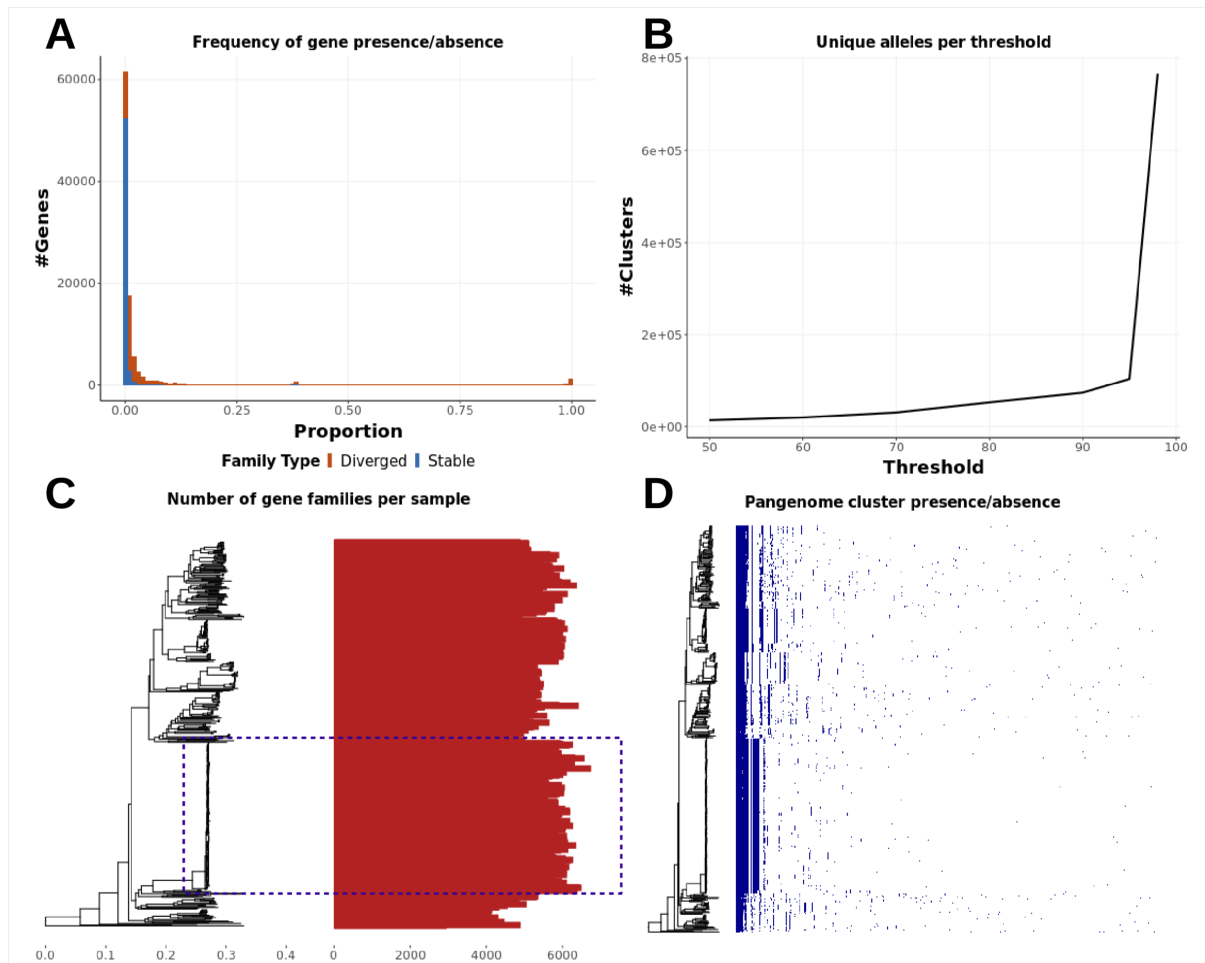

304 **Figure 4.** Summary figures of the pangenome of 496 *Pseudomonas* complete genomes. PIRATE was run on  
 305 default parameters with an MCL inflation value of 6 and a HSP query length threshold of 0.9. (A) The  
 306 proportion of genomes in which gene families are present. Gene families are considered stable (blue) when they  
 307 have only a single allele at 98% amino acid identity, and diverged (red) when they have >1 allele. (B) The  
 308 number of unique alleles at each amino acid percentage threshold. A unique allele is characterised as the highest  
 309 percentage identity threshold at which a unique sub-cluster of isolates from a single gene family was identified  
 310 by MCL. (C) The number of gene families per isolate ordered alongside the phylogenetic tree. (D) Shared gene  
 311 presence per isolate ordered alongside the phylogenetic tree. Gene family presence is indicated by a blue block  
 312 per column. Phylogenetic trees were generated from a core gene alignment from PIRATE and constructed using  
 313 rapidnj [22].

314

### 315 *Prochlorococcus marinus*

316 PIRATE was applied to a dataset of 45 draft genomes of *Prochlorococcus marinus*, a marine  
 317 cyanobacterium with extremely diverse gene complement, from the NCBI database (Supplementary  
 318 Table 2) [21]. The pangenome of *Prochlorococcus marinus* was reconstructed, including gene  
 319 sequence alignment, in 2,976s (50 min) using 8 threads, an MCL inflation value of 6 and a range of  
 320 sequence similarity thresholds from 0-95 % (0,10,20,30,40,50,60,70,80,90 and 95 %). This relaxed  
 321 range of sequence similarity thresholds allowed us to test the lower limits of BLAST/DIAMOND for  
 322 detecting homology in these data. The pangenome comprised of 91,593 loci clustered into 8,325 gene  
 323 clusters of which 867 (10.41 %) were considered core (present in >95% of isolates) (Figure 5.A).  
 324 There were large number of genes present at intermediate frequency, most likely due to strong  
 325 phylogeny structure within the limited sample size, and large numbers of genes private to related

326 lineages. The number of unique alleles per genome increased at percentage identities thresholds of  
 327 >70 %, representing the inter-lineage divergence, and increased sharply at thresholds >94-95%, which  
 328 is consistent with the sharp intra-species rise in allelic diversity observed in other species in this study  
 329 (Figure 5.B). The majority of *Prochlorococcus marinus* isolates had a pangenome size of ~1800 genes  
 330 per isolate with the exception of a single lineage which contained ~2600 genes (Figure 5.C).  
 331 Interestingly, the additional genetic complement of this lineage was not comprised primarily of genes  
 332 shared between all isolates, instead it contained a large proportion of rare genes (Figure 5.D).  
 333 Observation of the number of shared genes alongside the core genome phylogenetic tree of *P. marinus*  
 334 revealed that each of the deep branching lineages have a complement of approximately equal numbers  
 335 of 'lineage core' genes (Figure 5.D).  
 336

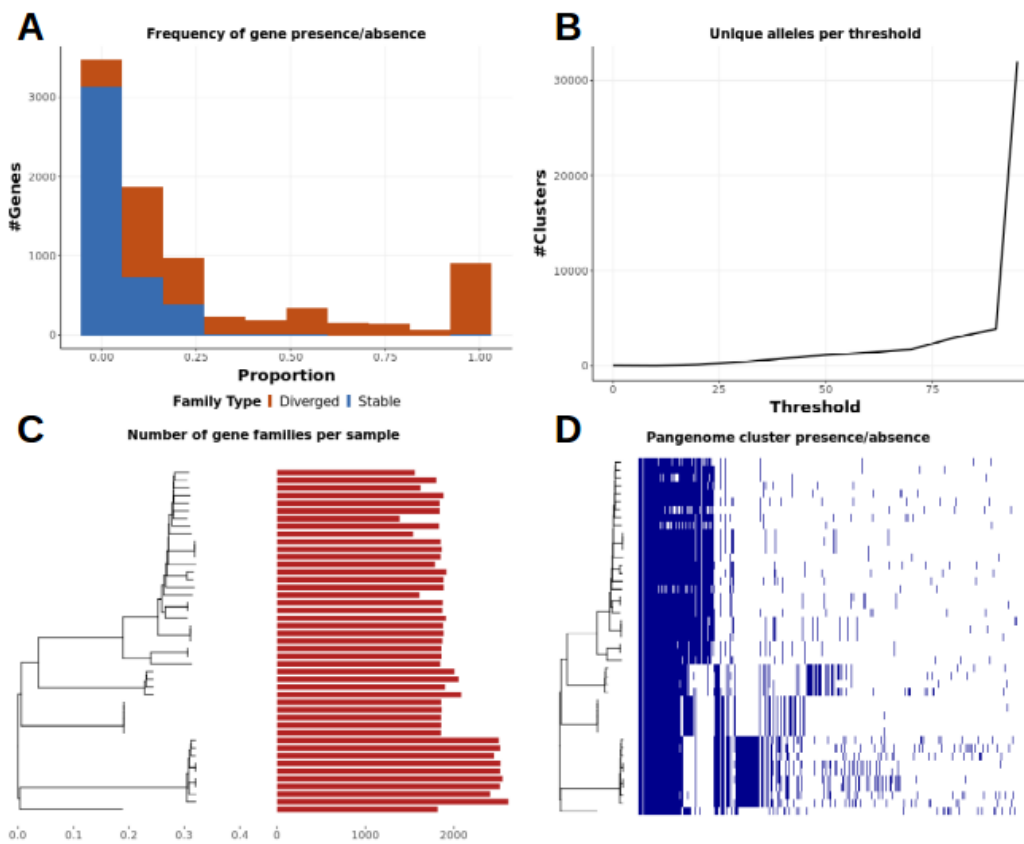

337  
 338 **Figure 5.** Summary figures of the pangenome of 45 *Prochlorococcus marinus* draft genomes. PIRATE was run  
 339 on default parameters with an MCL inflation value of 6, and a HSP query length threshold of 0.9 and a sequence  
 340 similarity step range of 0,10,20,30,40,50,60,70,80,90 and 95 %. (A) The proportion of genomes in which gene  
 341 families are present. Gene families are considered stable (blue) when they have only a single allele at 98%  
 342 amino acid identity, and diverged (red) when they have >1 allele. (B) The number of unique alleles at each  
 343 amino acid percentage threshold. A unique allele is characterised as the highest percentage identity threshold at  
 344 which a unique sub-cluster of isolates from a single gene family was identified by MCL. (C) The number of  
 345 gene families per isolate ordered alongside the phylogenetic tree. (D) Shared gene presence per isolate  
 346 alongside the phylogenetic tree. Gene family presence is indicated by a blue block per column. Phylogenetic  
 347 trees were generated from a core gene alignment from PIRATE and constructed using rapidnj [22].

## 348 **Conclusion**

349 Here we present PIRATE, a toolbox for pangenomic analysis of bacterial genomes, which provides a  
350 framework for exploring gene diversity by defining genes using relaxed sequence similarity  
351 thresholds. This pipeline builds upon existing tools using a novel methodology that can be applied to  
352 any annotated genomic features. PIRATE identifies and categorizes duplicated and disrupted genes,  
353 estimates allelic diversity, scores gene divergence and contextualizes genes using a pangenome graph.  
354 We demonstrate that it compares favourably with other commonly used tools for pangenomic  
355 analysis, in both execution time and computational resources, and is fully compatible with software  
356 for downstream analysis and visualisation. Furthermore, it is scalable to multiprocessor environments  
357 and can be applied to large numbers of genomes on modest hardware. Together the enhanced core and  
358 accessory genome characterisation capability, and the practical implementation advantages, make  
359 PIRATE a potentially powerful tool in bacterial genomics - a field in which there is an urgent need for  
360 tools that are applicable to increasingly large and complex datasets.

## 361 **Acknowledgements**

362 We would like to thank everyone who has contributed to the development of PIRATE through testing  
363 and feedback.

## 364 **Funding**

365 This work has been supported by BBSRC/NERC grant BB/M026388/1 awarded to E.F and MRC grant  
366 MR/L015080/1 awarded to S.S.

367 *Conflict of Interest:* none declared.

## 368 **Authors Contributions**

369 S.B. developed the software and wrote the manuscript. H.A.T. and N.M.C. contributed to and tested the  
370 software. S.K.S. and E.J.F. provided guidance and contributed to the manuscript.

## 371 **Software Availability**

372 Project name: "PIRATE: A fast and scalable pangenomics toolbox for clustering diverged orthologues in  
373 bacteria"

374 Project home page: <https://github.com/SionBayliss/PIRATE>

375 Operating system(s): Ubuntu 16.04, MacOS

376 Programming language: Perl, R.

377 Other requirements: mcl, mafft, cd-hit, fasttree, ncbi-blast+, bioperl, GNU parallel, diamond

378 License: GNU GPL v3.0

379 RRID: SCR\_017265

380 Data Availability: An archival copy of the code, scripts and other supporting data are also available via the  
381 GigaScience database GigaDB [19].



## 383 References

- 384 1. Sheppard SK, Guttman DS, Fitzgerald JR. Population genomics of bacterial host adaptation. *Nat Rev Genet.*  
385 2018;19:549–65.
- 386 2. Page AJ, Cummins CA, Hunt M, Wong VK, Reuter S, Holdén MTG, et al. Roary: rapid large-scale prokaryote pan  
387 genome analysis. *Bioinformatics.* 2015;31:3691–3.
- 388 3. Thorpe HA, Bayliss SC, Sheppard SK, Feil EJ. Piggy: a rapid, large-scale pan-genome analysis tool for intergenic regions  
389 in bacteria. *Gigascience.* 2018;7:1–11.
- 390 4. Sahl JW, Caporaso JG, Rasko DA, Keim P. The large-scale blast score ratio (LS-BSR) pipeline: a method to rapidly  
391 compare genetic content between bacterial genomes. *PeerJ.* 2014;2:e332.
- 392 5. Li L, Stoeckert CJ Jr, Roos DS. OrthoMCL: identification of ortholog groups for eukaryotic genomes. *Genome Res.*  
393 2003;13:2178–89.
- 394 6. Ding W, Baumdicker F, Neher RA. panX: pan-genome analysis and exploration. *Nucleic Acids Res.* 2018;46:e5.
- 395 7. Sheppard SK, Jolley KA, Maiden MCJ. A Gene-By-Gene Approach to Bacterial Population Genomics: Whole Genome  
396 MLST of *Campylobacter*. *Genes.* 2012;3:261–77.
- 397 8. Méric G, Yahara K, Mageiros L, Pascoe B, Maiden MCJ, Jolley KA, et al. A reference pan-genome approach to  
398 comparative bacterial genomics: identification of novel epidemiological markers in pathogenic *Campylobacter*. *PLoS One.*  
399 2014;9:e92798.
- 400 9. Lees JA, Harris SR, Tonkin-Hill G, Gladstone RA, Lo SW, Weiser JN, et al. Fast and flexible bacterial genomic  
401 epidemiology with PopPUNK. *Genome Res.* 2019;29:304–16.
- 402 10. Denamur E, Matic I. Evolution of mutation rates in bacteria. *Mol Microbiol.* 2006;60:820–7.
- 403 11. Li W, Godzik A. Cd-hit: a fast program for clustering and comparing large sets of protein or nucleotide sequences.  
404 *Bioinformatics.* 2006;22:1658–9.
- 405 12. Buchfink B, Xie C, Huson DH. Fast and sensitive protein alignment using DIAMOND. *Nat Methods.* 2015;12:59–60.
- 406 13. Camacho C, Coulouris G, Avagyan V, Ma N, Papadopoulos J, Bealer K, et al. BLAST+: architecture and applications.  
407 *BMC Bioinformatics.* 2009;10:421.
- 408 14. Enright AJ, Van Dongen S, Ouzounis CA. An efficient algorithm for large-scale detection of protein families. *Nucleic  
409 Acids Res.* 2002;30:1575–84.
- 410 15. Katoh K, Misawa K, Kuma K-I, Miyata T. MAFFT: a novel method for rapid multiple sequence alignment based on fast  
411 Fourier transform. *Nucleic Acids Res.* 2002;30:3059–66.
- 412 16. Hadfield J, Croucher NJ, Goater RJ, Abudahab K, Aanensen DM, Harris SR. Phandango: an interactive viewer for  
413 bacterial population genomics. *Bioinformatics.* 2017.
- 414 17. Brynildsrud O, Bohlin J, Scheffer L, Eldholm V. Rapid scoring of genes in microbial pan-genome-wide association  
415 studies with Scoary. *Genome Biol.* 2016;17:238.
- 416 18. Argimón S, Abudahab K, Goater RJE, Fedosejev A, Bhai J, Glasner C, et al. Microreact: visualizing and sharing data for  
417 genomic epidemiology and phylogeography. *Microb Genom.* 2016;2:e000093.
- 418 19. Bayliss SC, Thorpe HA, Coyle NM, Sheppard SK, Feil EJ. Supporting data for “PIRATE: A fast and scalable  
419 pangenomics toolbox for clustering diverged orthologues in bacteria”. *GigaScience Database.*  
420 <http://dx.doi.org/10.5524/100645>
- 421 20. Connor TR, Loman NJ, Thompson S, Smith A, Southgate J, Poplawski R, et al. CLIMB (the Cloud Infrastructure for  
422 Microbial Bioinformatics): an online resource for the medical microbiology community. *Microb Genom.* 2016;2:e000086.
- 423 21. Pruitt KD, Tatusova T, Maglott DR. NCBI reference sequences (RefSeq): a curated non-redundant sequence database of  
424 genomes, transcripts and proteins. *Nucleic Acids Res.* 2007;35:D61–5.
- 425 22. Simonsen M, Mailund T, Pedersen CNS. *Rapid Neighbour-Joining. Algorithms in Bioinformatics.* Springer Berlin  
426 Heidelberg; 2008. p. 113–22.



[Click here to view linked References](#)

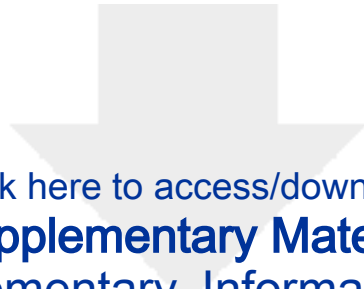

Click here to access/download  
**Supplementary Material**  
Supplementary\_Information.pdf

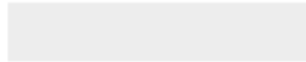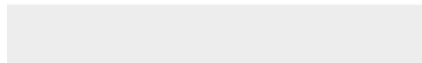



Click here to access/download  
**Supplementary Material**  
Supplementary\_Table\_2.tsv





Click here to access/download  
**Supplementary Material**  
Supplementary\_Table\_3.tsv



Dr. Sion C. Bayliss  
Milner Centre for Evolution  
Department of Biology and Biochemistry  
University of Bath  
Claverton Down  
Bath BA2 7AY  
UK

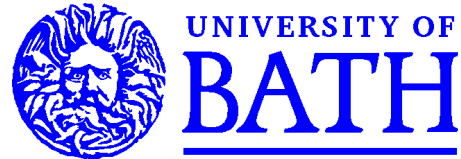

29/07/2019

E-mail: [s.bayliss@bath.ac.uk](mailto:s.bayliss@bath.ac.uk)

Tel: +44 (0)7838 072372

Dear Editor,

Please find enclosed the manuscript titled 'PIRATE: A fast and scalable pangenomics toolbox for clustering diverged orthologues in bacteria', which we would like to be considered for publication as an Technical Note in Gigascience. In this manuscript we describe PIRATE, a software toolbox for pangenomic analysis of bacterial genomes, which provides a framework for exploring the high diversity of genes observed in bacteria. PIRATE uses a novel approach, assessing clusters over a range of sequence similarity thresholds, to define gene orthologues. The software, made freely available for download from Github, identifies and categorizes duplicated and disrupted genes, estimates allelic diversity, scores gene divergence and contextualizes genes using a pangenome graph. PIRATE builds upon existing tools, in both speed and scope, and provides novel and complementary features that can be applied to any annotated genomic feature. In this manuscript we describe the underlying method and demonstrate the utility using a reference collection of *Staphylococcus aureus* genomes, highlighting how the identification of divergent core genes leads to a more conservative estimate of pangenome size. We additionally apply PIRATE to other large and diverse datasets for the purposes of both benchmarking and in order to illustrate the potential applications of the software. Given the rapid technological advances in sequencing technology and the ever expanding number of genomes available from diverse species, PIRATE represents a timely application that will be of broad interest to researchers interested in the field of bacterial genomics.

Yours sincerely,  
Dr Sion C. Bayliss, on behalf of all co-authors.
