# Supplementary material for: PIRATE: A fast and scalable pangenomics toolbox for clustering diverged orthologues in bacteria
Source: PubMed Central journal article supplement (PMC6785682; doi:10.1093/gigascience/giz119), 2019-10-09
Supplement: giz119_response_to_reviewer_comments_revision_2.pdf [file giz119_response_to_reviewer_comments_revision_2.pdf]

## Author's Response To Reviewer Comments

Close

The manuscript has been attached as a .docx formatted file. PDF also attached.

### Editor Notes:

1) Please add the GigaDB DOI link to your reference [19] in the bibliography  
(<http://dx.doi.org/10.5524/100645>):  
Added to reference.

2) Please add a sentence at the end of your "software availability" section along the lines of: "An archival copy of the code, scripts and other supporting data are also available via the GigaScience database GigaDB [19]."  
Added in text.

Close
